1 *Systematic Review*

# 2 **Mental health status and related factors influencing healthcare** 3 **workers during the COVID-19 pandemic: a systematic review** 4 **and meta-analysis**

5 **Jia Huang<sup>1,\*</sup>, Zhu-Tang Huang<sup>1</sup>, Xin-Ce Sun<sup>1</sup>, Ting-Ting Chen<sup>1</sup> and Xiao-Tian Wu<sup>2</sup>**

6 <sup>1</sup> The Second Clinical Medical College, Lanzhou University, Lanzhou, Gansu, China

7 <sup>2</sup> The First Clinical Medical College, Lanzhou University, Lanzhou, Gansu, China.

8 \* Correspondence: [jhuang2020@lzu.edu.cn](mailto:jhuang2020@lzu.edu.cn) (JH)

## 9 **Abstract:**

10 **Background:** The mental health of healthcare workers during the coronavirus-2019 pandemic was seriously affected, and the risk  
11 of mental health problems was high. The present study sought to systematically evaluate the mental health problems of healthcare  
12 workers worldwide during the pandemic and to determine the latest global frequency of COVID-19 associated mental health  
13 problems.

14 **Methods:** Data in the Cumulative Index to Nursing and Allied Health Literature (CINAHL), EMBASE, Elsevier, MEDLINE,  
15 PubMed, PsycINFO and the Web of Science before November 11, 2022, were systematically searched. Cohort, case-control and  
16 cross-sectional studies were included. The meta-analysis used a random effects model to synthesize the comprehensive prevalence  
17 rate of mental health problems. Subgroup analyses were performed based on time of data collection; whether the country was or  
18 was not developed; continent; doctors and nurses; doctors/nurses vs. other healthcare workers; and psychological evaluation scale.

19 **Results:** A total of 161 studies were included, including 341,014 healthcare workers worldwide, with women accounting for 82.8%.  
20 Occupationally, 16.2% of the healthcare workers were doctors, 63.6% were nurses and 13.3% were other medical staff. During the  
21 pandemic, 47% (95% confidence interval [CI], 35-60%) of healthcare workers reported job burnout, 38% (95% CI, 35-41%)  
22 experienced anxiety, 34% (95% CI 30-38%) reported depression, 30% (95% CI, 29-31%) had acute stress disorder, and 26% (95% CI,  
23 21-31%) had post-traumatic stress disorder.

24 **Conclusions:** The study found that there were common mental health problems among health care workers during the COVID-19  
25 pandemic. The most common was job burnout, followed by anxiety, depression, acute stress and post-traumatic stress disorder.  
26 Although the global pandemic has been brought under control, its long-term impact on the mental health of healthcare workers  
27 cannot be ignored. Additional research is required to develop measures to prevent, monitor and treat psychological disorders

**NOTE: This preprint reports new research that has not been certified by peer review and should not be used to guide clinical practice.**

28 among healthcare workers.

29 **Keywords:** COVID-19; Coronavirus; Healthcare workers; Mental health; Meta-analysis  
30

---

## 31 **1. Introduction**

32 On January 9, 2020, a kind of novel coronavirus 2019-NCoV was officially identified as the pathogen of a viral  
33 pneumonia outbreak in Wuhan, China [1]. As of January 19, 2023, the cumulative number of confirmed cases of  
34 COVID-19 worldwide has reached 663,001,898, including 6,707,959 deaths, and these numbers are still increasing [2].

35 The pandemic situation of COVID-19, like other pandemics, has had a significant impact on the mental health of  
36 ordinary people, but because of the particularity of the working conditions of medical staff, they suffered a greater  
37 impact on their mental health [3]. Lack of treatment experience and protective equipment, understaffing and work  
38 overload, and ethical dilemmas in allocating scarce resources to other patients who also needed help had deleterious  
39 effects on the mental health of healthcare workers. Other factors, such as the potential risk of infecting family  
40 members and the and the emergency deployment of many non-respiratory and infectious disease professionals to  
41 front-line intensive care units with high risk in the face of a sharp increase in the number of patients, not only put  
42 healthcare workers worldwide at higher risk of infection, but caused great psychological stress [4-7]. Studies of the  
43 SARS pandemic and MERS epidemic showed that these psychological stresses increased the risk of mental health  
44 diseases among healthcare workers, including anxiety, depression, post-traumatic stress symptoms and job burnout  
45 [8,9]. These conditions not only had adverse effects on healthcare workers, but had serious adverse consequences for  
46 their co-workers, families, and society in general [10].

47 Many articles on this subject have been published recently, most of which showed an increase in the prevalence  
48 of mental diseases among health workers, but most of these studies were either aimed at all social people or people in  
49 non-medical fields or in specific medical personnel, such as front-line personnel, psychiatric professionals,  
50 rehabilitation areas, and some studies were carried out in specific countries and regions [11-15]. At present, the  
51 literature search deadline of the published research is mostly in 2020 or 2021 [16-19], and there were few studies  
52 included health care worker prevalence published in 2022 [20]. Because of the ongoing nature of the COVID-19  
53 pandemic and the continuous change of the global pandemic situation, the mental health status of global healthcare  
54 workers is in a state of dynamic change. Our analysis, which included studies published through November 2022,

55 evaluated the existing scientific evidence on the mental health status of medical staff during the COVID-19 pandemic.  
56 These findings can therefore provide the latest estimates on the rates of depression, anxiety, burnout, acute stress and  
57 post-traumatic stress disorder among healthcare workers.

58 This study conducted an innovative subgroup analysis according to the time of data collection included in the  
59 article. Compared with the previous subgroup analysis based on the publication time of the included articles, our  
60 findings can more accurately determine the mental health status of health care workers around the world at different  
61 times.

## 62 **2. Materials and Methods**

63 This systematic review and meta-analysis adhered to the Preferred Reporting Items for Systematic Reviews and  
64 Meta-Analyses (PRISMA) guidelines [21], and detailed information is provided in **S1 Table**. The study protocol has  
65 been registered in the International Prospective Register of Systematic Reviews (PROSPERO) as No. CRD42023392547.

### 66 **2.1. Search strategy and selection criteria**

67 To find all relevant studies, two independent researchers (J. Huang and T. T. Chen) searched the Cumulative  
68 Index to Nursing and Allied Health Literature (CINAHL), EMBASE, Elsevier, MEDLINE, PubMed, PsycINFO and  
69 Web of Science databases for all studies published through November 11, 2022, using medical subject word (MeSH)  
70 terms and specific keywords. The specific keywords used to search the databases included COVID-19 OR COVID 19  
71 OR COVID 19 OR Infection SARS-CoV-2 OR SARS CoV 2 Infection OR SARS-CoV-2 Infections OR 2019 Novel  
72 Coronavirus Disease OR 2019 Novel Coronavirus Infection OR 2019-nCoV Disease OR 2019 nCoV Disease OR  
73 2019-nCoV Diseases OR Disease, 2019-nCoV OR COVID-19 Virus Infection OR COVID-19 Virus Infection OR  
74 COVID-19 Virus Infections OR Infection, COVID-19 Virus OR Virus Infection, COVID-19 OR Coronavirus Disease  
75 2019 OR Disease 2019, Coronavirus OR Coronavirus Disease-19 OR Coronavirus Disease 19 OR Severe Acute  
76 Respiratory Syndrome Coronavirus 2 Infection OR SARS Coronavirus 2 Infection OR COVID-19 Virus Disease OR  
77 COVID 19 Virus Disease OR COVID-19 Virus Diseases OR Disease, COVID-19 Virus OR Virus Disease, COVID-19 OR  
78 2019-nCoV Infection OR 2019 nCoV Infection OR 2019-nCoV Infections OR Infection, 2019-nCoV OR COVID19 OR  
79 COVID-19 Pandemic OR COVID 19 Pandemic OR Pandemic, COVID-19 OR COVID-19 Pandemics AND Mental

80 Health OR Health, Mental OR Mental Hygiene OR Hygiene, Mental AND Personnel, Health OR Healthcare Providers  
81 OR Healthcare Provider OR Provider, Healthcare OR Healthcare Workers OR Healthcare Worker OR Healthcare  
82 Professionals OR Healthcare Professional OR Professional, Healthcare OR "Health Personnel". The retrieval strategy is  
83 described in detail in the supplementary document (**Retrieval strategy**).

## 84 **2.2. Eligibility criteria**

85 All the retrieved articles were screened independently by two researchers (J. Huang and T.T. Chen). Title and  
86 abstract were screened initially, with all articles that did not meet the inclusion criteria excluded. The full texts of the  
87 remaining articles were screened subsequently.

88 Criteria for inclusion in the systematic review and meta-analysis were: (a) studies of professionals who worked  
89 as healthcare workers during the COVID-19 pandemic; (b) cohort, cross-sectional and case-control studies; (c) studies  
90 that used a validated structured assessment scale; (d) studies of sample size  $\geq 100$  persons; and (e) studies with  
91 original and independent data. In addition, studies that reported mental health outcomes during the pandemic had to  
92 include at least one of the following categories: anxiety, depression, job burnout, post-traumatic stress disorder and  
93 acute stress disorder, with the prevalence rate being reported or able to be calculated. Studies were excluded if they  
94 reporting results from people other than healthcare workers, such as the general public, students, or police or were  
95 written in a language other than English.

## 96 **2.3. Data extraction**

97 Two researchers (X.C. Sun and Z.T. Huang) comprehensively and independently extracted the basic data  
98 included in the study, including: first author, data collection time, national and economic level, continent, study  
99 design, sample size, age, gender (percentage of males), occupation; numbers of individuals with depression, anxiety,  
100 job burnout, post-traumatic stress disorder, and acute stress disorder; and assessment tools used. After the data was  
101 extracted, the two reviewers resolved any differences by consensus; if necessary, a third reviewer (J. Huang) was  
102 consulted.

## 103 **2.4. Quality assessment**

104 The quality of each study included study in this analysis was evaluated using the American Institute for  
105 Healthcare Quality and Research (AHRQ) cross-sectional study evaluation criteria [22] and the Newcastle-Ottawa

106 observational study scale (NOS) [23]. The AHRQ consists of 11 items, each with a score of 0 or 1; with total scores of  $\leq$   
107 3, 4-7, and  $\geq 8$  indicating low, medium quality, and high quality, respectively. The NOS consists of eight items that are  
108 used to evaluate cohort and case-control studies; scores range from 0-9, with scores  $<6$  regarded as low quality and  
109 those  $\geq 6$  as high quality. Three reviewers (J. Huang, Z.T. Huang and X.C. Sun) evaluate the quality of each study  
110 independently, with any differences resolved by discussions.

## 111 **2.5. Statistical analysis**

112 The comprehensive prevalence rate of mental health problems among health workers during the COVID-19  
113 pandemic was calculated as the main effect, with the metaprop command in STATA used meta-analysis [24]. The  
114 random effect model was used to calculate the estimated comprehensive prevalence of mental health disorders to take  
115 into account the expected heterogeneity caused by changes in the characteristics of the study. Variability was assessed  
116 using the  $I^2$  index, with indices of 25%, 50% and 75% indicating low, medium and high heterogeneity, respectively, in  
117 the random effects model [25]. Subgroup analyses were performed based on six criteria: time of data collection,  
118 whether the country was or was not developed, continent, doctors and nurses, doctors/nurses vs. other healthcare  
119 workers, and assessment tools. The data collection time was divided into three groups based on the year of data  
120 collection, rather than the year of publication: 2020, 2021, and 2022. Countries around the world were divided into  
121 developed and developing countries according to the human development index(HDI) proposed by the United  
122 Nations Development Programme[26]. The study of other healthcare workers was abandoned when studying doctors  
123 and nurses, followed by the scale used by the study. Except for the three subgroups of data collection time, continent  
124 and evaluation tool, the other subgroups were defined as binary. The six models were evaluated independently, with  
125 each factor examined separately. All statistical analyses were performed using STATA16.0 software, with a two-side  
126 p-value  $<0.05$  defined as statistically significant.

## 127 **3. Results**

### 128 **3.1. Search results**

129 The literature search identified 7,259 citations, of which 1,595 were deleted due to repetition, and 5,444 were  
130 excluded after reading their titles and abstracts. A total of 220 articles were evaluated and screened. Among them, 8

131 studies were excluded due to topic mismatch, 42 studies were excluded due to inconsistent results, 1 study was  
132 excluded as it was not an original research, and 8 studies were excluded as they were letters to journal editors.  
133 Detailed reasons for the exclusions can be found in **S2 Table**. Hence, a total of 161 studies were incorporated into this  
134 systematic review and meta-analysis, and all of them are appropriately cited in the reference section [27-187]. **Fig 1**  
135 shows the flow diagram of the search process and study selection, following the PRISMA protocol.

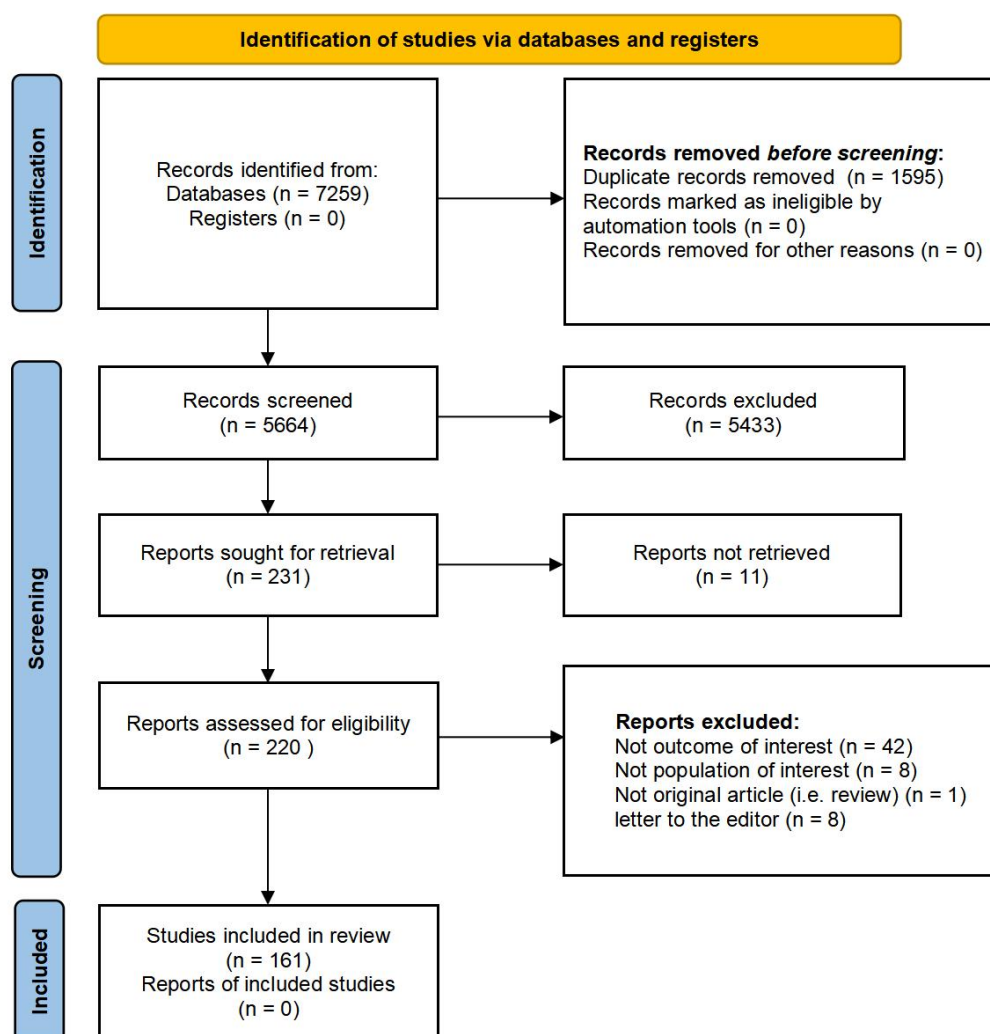

From: Page MJ, McKenzie JE, Bossuyt PM, Boutron I, Hoffmann TC, Mulrow CD, et al. The PRISMA 2020 statement: an updated guideline for reporting systematic reviews. *BMJ* 2021;372:n71. doi: 10.1136/bmj.n71  
For more information, visit: <http://www.prisma-statement.org/>

136

137 Fig 1. Prisma flow-diagram.

138 **3.2. Study characteristics**

139 All 161 included studies focused on the mental health of health workers during the pandemic; of these, 136  
140 studies (84.5%) evaluated anxiety, 134 (83.2%) evaluated depression, 18 (11.2%) evaluated job burnout, 45 (27.9%)  
141 evaluated post-traumatic stress disorder, and two (1.2%) evaluated acute stress disorder. Of the 161 included studies,  
142 158 (98.1%) were cross-sectional and three (1.9%) were cohort studies. The studies evaluated healthcare workers from  
143 49 countries on five continents, of which 94 (58.4%), 37 (23.0%), 11 (6.8%), 10 (6.2%), 5 (3.1%) and 4 (2.5%) studies were  
144 conducted in Asia, Europe, Africa, North America, South America and Oceania, respectively. The highest number of  
145 studies, totaling 34 (21.1%), originated from China, followed by 10 studies (6.2%) from Italy. The United States and  
146 Iran tied for third place, each with 8 studies (5.0%). Additionally, three studies (1.9%) were conducted across multiple  
147 countries. The 161 studies included 341,014 participants, 82.8% of whom were women. Although not all studies  
148 reported age, those that reported age found that participants ranged in age from 18 to  $\geq 60$  years. Evaluation of their  
149 occupations showed that 16.2% of the participants were doctors, 63.6% were nurses, and 13.3% were other medical  
150 personnel. Data for 138 studies (85.7%) were collected in 2020, whereas data for 15 (9.3%) and two (1.2%) studies were  
151 collected in 2021 and 2022, respectively, with data collection time not reported for the remaining six (3.7%) studies. Of  
152 the 155 studies reporting data collection time, 138 (89%) were collected in 2020, 15 (9.7%) were collected in 2021, and 2  
153 (1.3%) were collected in 2022. **S3, S4 and S5 Tables** present detailed information and quality assessment scores of all  
154 included studies.

### 155 **3.3. Meta-analysis of mental health problems among healthcare workers** 156 **during the COVID-19 pandemic**

#### 157 **3.3.1. Burnout**

158 Nineteen studies, including 165,770 participants, reported the prevalence of job burnout, with the combined  
159 prevalence rate of job burnout in health workers being 47% (95% CI, 38%-55%, **Fig 2**). Individual study estimates  
160 ranged from 12% to 73% and there was evidence of high between-study heterogeneity ( $I^2=99.81\%$ ,  $p<0.001$ ).

161 Subgroup analysis: burnout. As shown in **Table 1**, the combined estimate for 2020 was 47% (95% CI, 33%-61%),  
162 and the combined estimate for 2021 was 44% (95% CI, 35%-53%). There was no significant difference in prevalence  
163 among different years ( $p=0.731$ ).

164 It was estimated that the prevalence rate of job burnout was significantly different in different regions ( $p < 0.001$ ).  
 165 Studies from Oceania had the highest estimated combined prevalence rate (70%; 95% CI, 69%-71%) and the lowest in  
 166 South America (15%; 95% CI, 10%-21%).

167 Fourteen studies used the Maslach Job Burnout scale (MBI) [188], and the combined prevalence of all these  
 168 studies was estimated at 47% (95% CI, 37%-57%). The highest combined prevalence rate was calculated from the  
 169 study using the Oldenburg Burnout Inventory (OLBI) [189] (67%; 95% CI, 65%-68%), and the study using the  
 170 single-item Mini-Z burnout assessment [190] obtained the lowest comprehensive estimate (15%; 95% CI, 10%-21%).  
 171 The combined estimated values of these subgroups were significantly different ( $p < 0.001$ ).

172 There was no evidence of differential prevalence estimates across other subgroups: the degree of national  
 173 development ( $p = 0.515$ ); doctors and nurses ( $p = 0.417$ ); and doctors and nurses vs other healthcare workers ( $p = 0.079$ ).

174 S1-S6 Figs display the specific results of subgroup analyses.

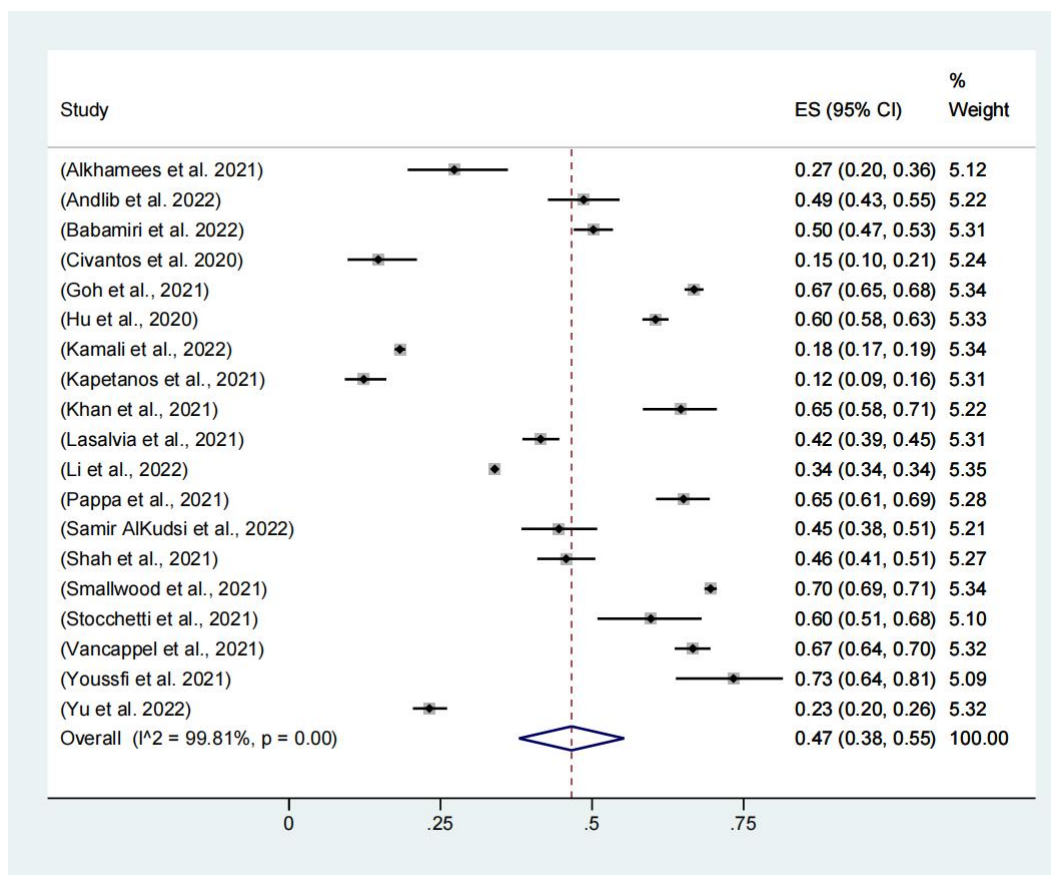

175  
 176 Fig 2. Meta-analysis and pooled estimate of burnout in health care workers during the COVID-19 pandemic.  
 177



178 **Table 1 Subgroup analyses for studies on burnout.**

| Subgroup analysis       |               | No. of studies | Prevalence %<br>(95% CI) | I <sup>2</sup> | Between-group<br>difference |
|-------------------------|---------------|----------------|--------------------------|----------------|-----------------------------|
| Data collection<br>time | 2020          | 15             | 47 (33-61)               | 99.82%         | p=0.731                     |
|                         | 2021          | 3              | 44 (35-53)               | -              |                             |
|                         |               |                |                          |                |                             |
| Continent               | Oceania       | 1              | 70 (69-71)               | -              | p<0.001                     |
|                         | Europe        | 5              | 60 (50-70)               | -              |                             |
|                         | Africa        | 2              | 52 (48-56)               | -              |                             |
|                         | Asia          | 8              | 37 (28-46)               | 99.67%         |                             |
|                         | North America | 2              | 31 (28-33)               | -              |                             |
|                         | South America | 1              | 15 (10-21)               | -              |                             |
| Assessment tools        | OLBI          | 1              | 67 (65-68)               | -              | p<0.001                     |
|                         | MBI           | 14             | 47 (37-57)               | 99.83%         |                             |
|                         | SPFI          | 1              | 46 (41-51)               | -              |                             |
|                         | ProQoL        | 2              | 28 (25-31)               | -              |                             |
|                         | Mini-Z        | 1              | 15 (10-21)               | -              |                             |
|                         |               |                |                          |                |                             |

Abbreviation: MBI=Maslach Burnout Inventory; Mini-Z=a non-proprietary, single-item burnout measure; OLBI=Oldenburg Burnout Inventory; ProQoL=Professional Quality of Life scale; SPFI=Stanford Professional Fulfillment Index Questionnaire

179 **3.3.2. Anxiety**

180 A total of 136 studies, involving 112,805 participants, reported the prevalence of anxiety disorders, with the  
 181 combined prevalence rate of anxiety among health workers being 38% (95% CI, 35-41%, **Fig 3**). Individual study  
 182 estimates ranged from 6% to 90% and there was evidence of high heterogeneity between studies (I<sup>2</sup>=99.67%, p<0.001).

183 Subgroup analysis: anxiety. As shown in **Table 2**, the combined estimate for 2020 was 38% (95% CI, 35%-42%),  
 184 the combined estimate for 2021 was 41% (95% CI, 34%-47%), and the combined estimate for 2022 was 29% (95% CI,  
 185 26%-33%). The prevalence rate of 2022 was lower than that of 2021, and there were significant differences in different  
 186 years (p<0.001).

187 A total of 54 studies used the Generalized Anxiety Disorder 7 (GAD-7) questionnaire [191], and the combined  
 188 prevalence rate of all these studies was estimated at 39% (95% CI, 34%-45%). The highest combined prevalence rate  
 189 was calculated from the study using the State-Trait Anxiety Inventory (STAI) [192] (56%; CI, 39%-73%), and the study  
 190 using Symptom Checklist 90 (SCL-90) [193] produced the lowest comprehensive estimate (10%; 95% CI, 8%-12%). The  
 191 combined estimated values of these subgroups were significantly different (p<0.001).

192 There was no evidence of differential prevalence estimates across other subgroups: the degree of national  
 193 development( $p=0.435$ ); continents ( $p=0.298$ ); doctor and nurse ( $p=0.796$ ); and doctors and nurses vs other healthcare  
 194 workers ( $p=0.378$ ). S7-S12 Figs display the specific results of subgroup analyses.

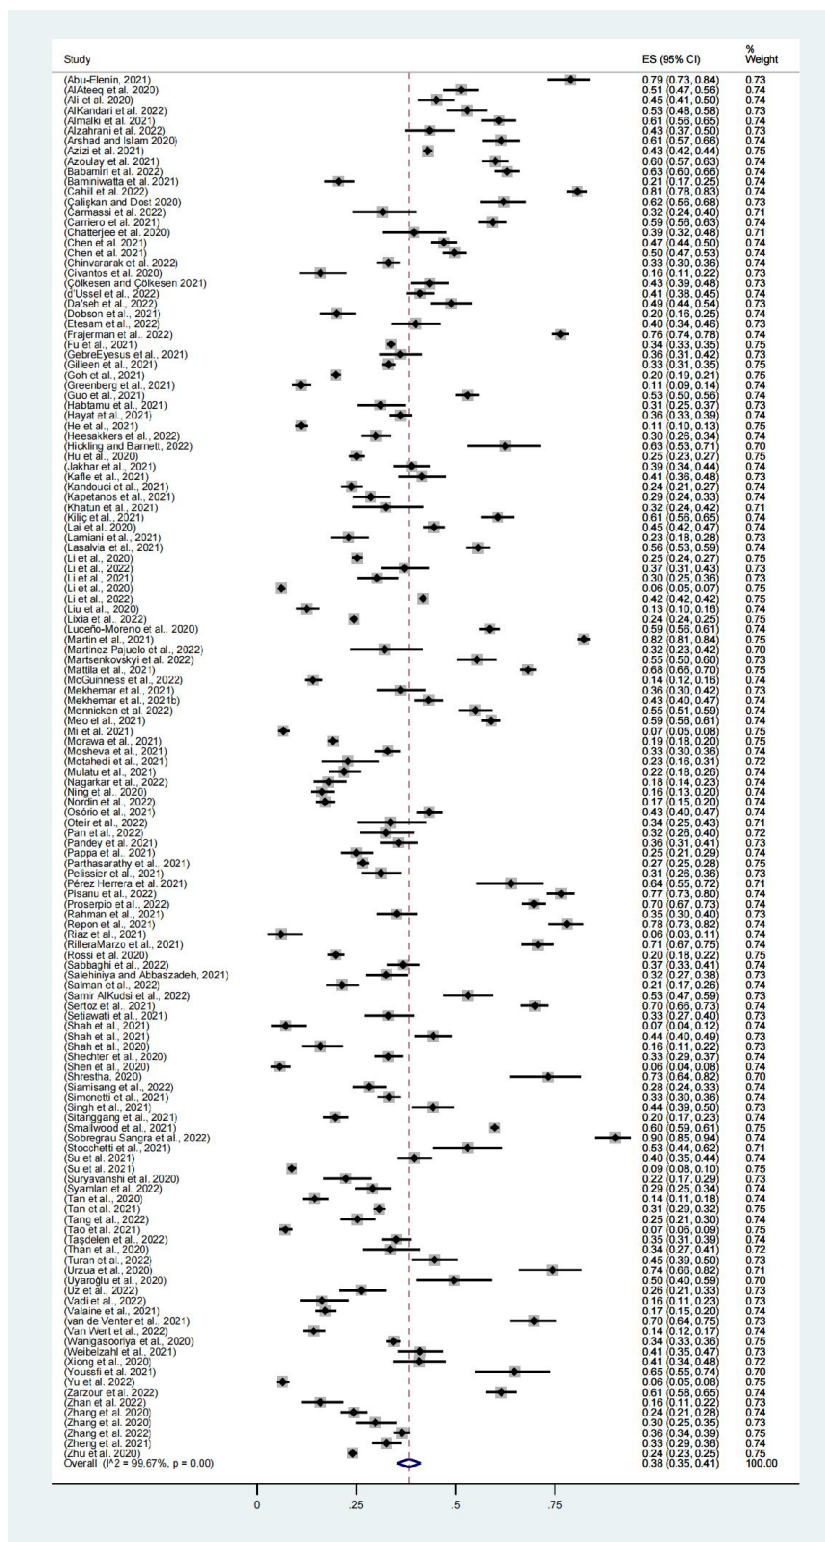

195

196 Fig 3. Meta-analysis and pooled estimate of anxiety in health care workers during the COVID-19 pandemic.

197 **Table 2 Subgroup analyses for studies on anxiety.**

| Subgroup analysis    |           | No. of studies | Prevalence %<br>(95% CI) | I <sup>2</sup> | Between-group<br>difference |
|----------------------|-----------|----------------|--------------------------|----------------|-----------------------------|
| Data collection time | 2020      | 117            | 38 (35-42)               | 99.60%         | p<0.001                     |
|                      | 2021      | 14             | 41 (34-47)               | 98.80%         |                             |
|                      | 2022      | 2              | 29 (26-33)               | -              |                             |
|                      |           |                |                          |                |                             |
| Assessment tools     | STAI      | 6              | 56 (39-73)               | 99.08%         | p<0.001                     |
|                      | GHQ-28    | 2              | 55 (52-58)               | -              |                             |
|                      | PROMIS    | 2              | 53 (51-55)               | -              |                             |
|                      | GAD-7/BAI | 1              | 50 (40-59)               | -              |                             |
|                      | HADS      | 19             | 43 (32-55)               | 99.67%         |                             |
|                      | ISR       | 1              | 41 (35-47)               | -              |                             |
|                      | GAD-7     | 54             | 39 (34-45)               | 99.73%         |                             |
|                      | DASS-42   | 4              | 38 (28-47)               | 92.05%         |                             |
|                      | DASS-21   | 27             | 36 (30-41)               | 99.04%         |                             |
|                      | GAD-2     | 4              | 29 (22-36)               | 97.45%         |                             |
|                      | SAS       | 9              | 25 (14-37)               | 99.69%         |                             |
|                      | PHQ-4     | 2              | 18 (17-19)               | -              |                             |
|                      | PHQ-2     | 1              | 16 (11-22)               | -              |                             |
|                      | CAS       | 2              | 11 (10-13)               | -              |                             |
|                      | SCL-90    | 2              | 10 (8-12)                | -              |                             |

Abbreviation: BAI=Beck Anxiety Inventory; CAS=Coronavirus Anxiety Scale; DASS-21=The Depression Anxiety Stress Scale-21; DASS-42=The Depression Anxiety Stress Scale-42; GAD-2=The 2-item Generalized Anxiety Disorder Scale; GAD-7=General Anxiety Disorder-7; GHQ-28=General Health Questionnaire; HADS=The Hospital Anxiety and Depression Scale; ISR=The self-report questionnaire ICD-10 Symptom Rating; PROMIS=National Institution of Mental Health (NIMH) Patient-Reported Outcomes Measurement Information System; SAS=Self-Rating Anxiety Scale; SCL-90=Symptom Checklist 90; STAI=State Trait Anxiety Inventory Scale; PHQ-2=The 2-item Generalized Anxiety Disorder Scale; PHQ-4=Patient Health Questionnaire-4

### 198 3.3.3. Depression

199 A total of 134 studies, involving 316,891 participants, reported the prevalence of depression, with the combined  
 200 prevalence rate of depression among healthcare workers being 34% (95% CI, 30-38%, **Fig 4**). Estimates for a single  
 201 study ranged from 4% to 91%, and there was evidence of high heterogeneity between studies (I<sup>2</sup>=99.81%, p<0.001).

202 Subgroup analysis: depression. As shown in **Table 3**, the combined estimate for 2020 was 33% (95% CI, 30%-37%),  
 203 the combined estimate for 2021 was 38% (95% CI, 27%-48%), and the combined estimate for 2022 was 38% (95% CI,



216 **Table 3 Subgroup analyses for studies on depression.**

| Subgroup analysis    |         | No. of studies | Prevalence % (95% CI) | I <sup>2</sup> | Between-group difference |
|----------------------|---------|----------------|-----------------------|----------------|--------------------------|
| Data collection time | 2020    | 113            | 33 (30-37)            | 99.68%         | p=0.255                  |
|                      | 2021    | 16             | 38 (27-48)            | 99.64%         |                          |
|                      | 2022    | 2              | 38 (34-41)            | -              |                          |
| Assessment tools     | GAD-7   | 1              | 28(25-31)             | -              |                          |
|                      | GHQ-28  | 1              | 18(15-20)             | -              |                          |
|                      | HAM-D   | 1              | 44(38-49)             | -              |                          |
|                      | GAD-2   | 1              | 25(19-31)             | -              |                          |
|                      | IRS     | 1              | 74(69-79)             | -              |                          |
|                      | SAS     | 1              | 44(41-47)             | -              |                          |
|                      | PHQ-9   | 54             | 33(29-38)             | 99.69%         |                          |
|                      | DASS-21 | 27             | 32(27-38)             | 98.94%         |                          |
|                      | HADS    | 19             | 35(27-43)             | 99.42%         |                          |
|                      | PHQ-8   | 2              | 68(66-70)             | -              |                          |
|                      | BDI     | 3              | 24(8-40)              | -              |                          |
|                      | PHQ-2   | 7              | 39(27-52)             | 98.58%         |                          |
|                      | SDS     | 5              | 42(19-65)             | 99.92%         |                          |
|                      | CES-D   | 3              | 42(25-59)             | -              |                          |
|                      | DASS-42 | 3              | 29(20-38)             | -              |                          |
| SCL-90               | 2       | 8(6-10)        | -                     |                |                          |
| PHQ-4                | 3       | 23(14-32)      | -                     |                |                          |
|                      |         |                |                       |                | p<0.001                  |

Abbreviation: BDI=Beck Depression Inventory; CES-D=The Center for Epidemiologic Studies Depression Scale; DASS-21=The Depression Anxiety Stress Scale-21; DASS-42=The Depression Anxiety Stress Scale-42; GAD-2=The 2-item Generalized Anxiety Disorder Scale; GAD-7=General Anxiety Disorder-7; GHQ-28=General Health Questionnaire; HADS=The Hospital Anxiety and Depression Scale; HAM-D=Hamilton Depression Scale; IRS=The self-report questionnaire ICD-10 Symptom Rating; PHQ-4=Patient Health Questionnaire-4; PHQ-8=The 8-item Patient Health Questionnaire; PHQ-9=The Patient Health Questionnaire, 9-item version; SAS=Self-Rating Anxiety Scale; SCL-90=Symptom Checklist 90; SCL-90=Symptom Checklist 90; SDS=Self-Rating Depression Scale

### 217 **3.3.4. Acute stress disorder**

218 Two studies, involving 5,776 participants, reported the prevalence of acute stress disorder, with the combined  
 219 prevalence rate of acute stress disorder among healthcare workers being 30% (95% CI, 29-31%, **Fig 5**). The data were  
 220 collected in 2020. Two evaluation scales were used: Stanford acute Stress Reaction Questionnaire (SARS-Q) (197) and  
 221 Impact of Event Scale-Revised Questionnaires (IES-R) (198).

222 No subgroup analysis was performed because few studies reported the prevalence of acute stress disorder (<3).

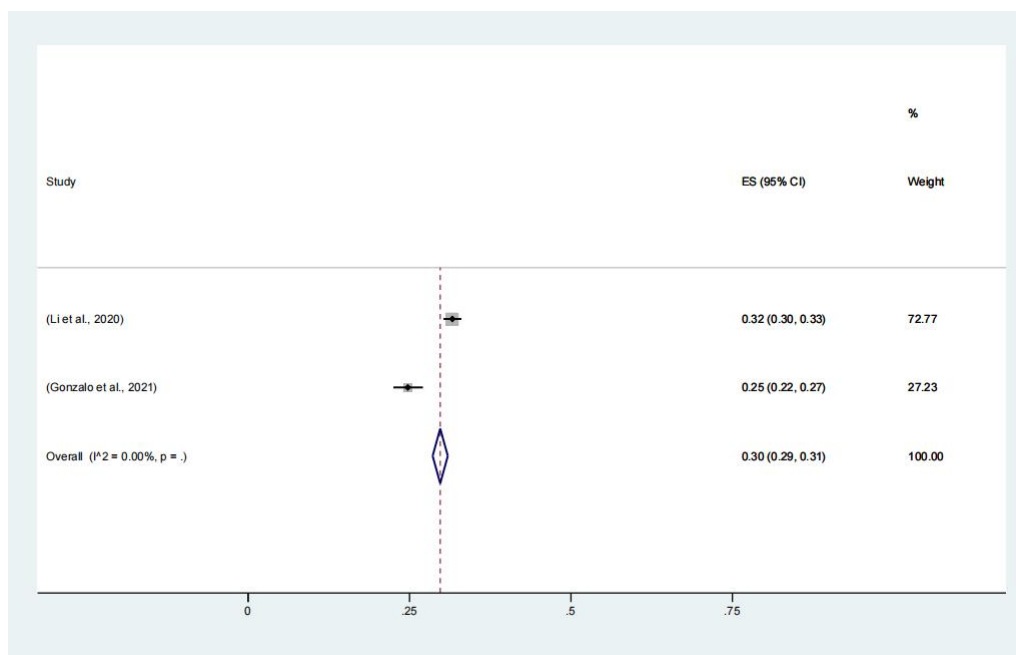

Fig 5. Meta-analysis and pooled estimate of acute stress disorder in health care workers during the COVID-19 pandemic.

### 3.3.5. Post-traumatic stress disorder

Forty-four studies, including 89,977 participants, reported the prevalence of post-traumatic stress disorder (PTSD), with the combined prevalence rate of PTSD among healthcare workers being 26% (95% CI, 22-29%, Fig 6). Individual study estimates ranged from 2% to 67% and there was evidence of high between-study heterogeneity ( $I^2=99.64\%$ ,  $p<0.001$ ).

Subgroup analysis: post-traumatic stress disorder. As shown in Table 4, the combined estimate for 2020 was 25% (95% CI, 21%-29%) and for 2021 was 28% (95% CI, 13%-42%). The prevalence rate was similar in different years and there was no significant difference ( $p=0.733$ ).

It was estimated that the prevalence rate of post-traumatic stress disorder was significantly different in different regions ( $p<0.001$ ). The study from South America produced the highest estimated combined prevalence rate (35%; 95% CI, 33%-38%) and the lowest in Africa (16%; 95% CI, 12%-21%).

Twenty-two studies used the Impact of Event Scale-Revised (IES-R) [198], and the combined prevalence rate of all these studies was estimated at 32% (95% CI, 23%-41%), which was the highest. The study using the Acute Stress Disorder Scale (ASDS) [199] yielded the lowest comprehensive estimate (9%; 95% CI, 8%-11%). The combined estimated values of these subgroups were significantly different ( $p<0.001$ ).

241 There was no evidence of differential prevalence estimates across other subgroups: the degree of national  
 242 development( $p=0.107$ ); doctors and nurses ( $p=0.336$ ); and doctors and nurses vs other healthcare workers ( $p=0.473$ ).  
 243 **S19-S24 Figs** display the specific results of subgroup analyses.

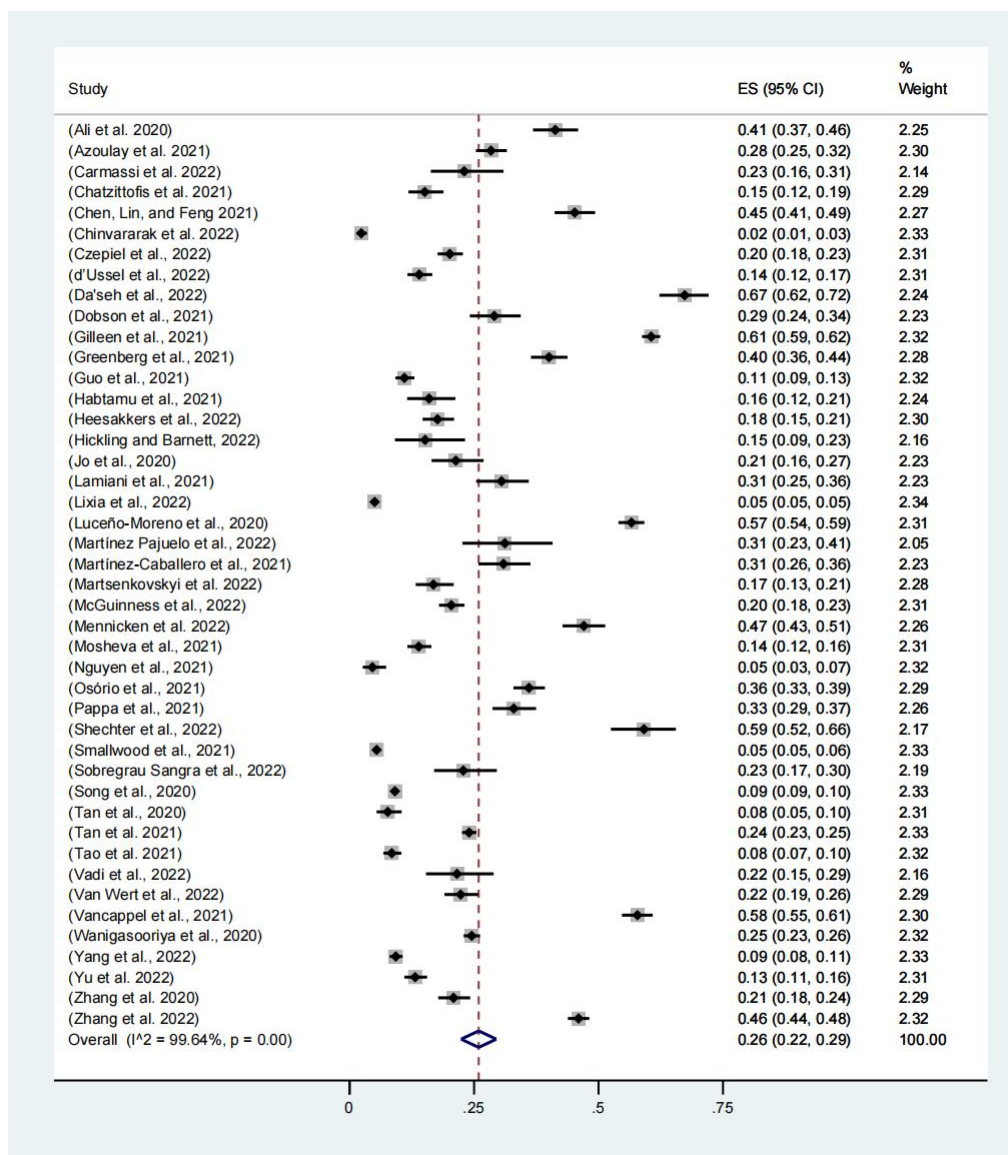

244  
 245 **Fig 6. Meta-analysis and pooled estimate of post-traumatic stress disorder in health care workers during the COVID-19**  
 246 **pandemic.**

247 **Table 4 Subgroup analyses for studies on post-traumatic stress disorder.**

| Subgroup analysis    |         | No. of studies | Prevalence % (95% CI) | I <sup>2</sup> | Between-group difference |
|----------------------|---------|----------------|-----------------------|----------------|--------------------------|
| Data collection time | 2020    | 36             | 25(21-29)             | 99.66%         | p=0.733                  |
|                      | 2021    | 7              | 28(13-42)             | 99.51%         |                          |
| Continent            | Oceania | 3              | 18(4-32)              | -              |                          |
|                      | Europe  | 17             | 33(25-42)             | 99.25%         |                          |

|                  |               |    |           |        |         |
|------------------|---------------|----|-----------|--------|---------|
|                  | Africa        | 1  | 16(12-21) | -      |         |
|                  | Asia          | 17 | 19(15-23) | 99.54% |         |
|                  | North America | 4  | 27(12-43) | 98.38% |         |
|                  | South America | 2  | 35(33-38) | -      |         |
|                  |               |    |           |        | p<0.001 |
| Assessment tools | IES-R         | 22 | 32(23-41) | 99.74% |         |
|                  | PCL           | 19 | 20(17-22) | 99.02% |         |
|                  | DTS-8         | 1  | 31(26-36) | -      |         |
|                  | ASDS          | 2  | 9(8-11)   | -      |         |
|                  |               |    |           |        | p<0.001 |

Abbreviation: ASDS=Acute Stress Disorder Scale; DTS-8=The Davidson Trauma Scale; IES-R=The 22-item Impact of Event Scale-Revised; PCL=Post Traumatic Stress Disorder Checklist

### 3.4. Quality assessment

The quality of the 158 cross-sectional studies was evaluated using the AHRQ [22], which found that the average score was  $6.03 \pm 1.12$ . Of these 158 studies, 17 (10.8%) had scores  $\geq 8$ , indicating high-quality, and the remaining 141 (89.2%) had scores of 4 to 7, indicating medium-quality; none had scores  $<4$ , indicating low quality. Evaluation of the three cohort studies with the NOS scale[23] showed that their average score was  $6.67 \pm 0.47$ , with all three studies having scores  $\geq 6$ , indicating high quality. **S4 and S5 tables** provides details of the study quality scores.

## 4. Discussion

This meta-analysis of 161 studies involving 341,014 healthcare workers was performed to provide an update on the prevalence of multiple mental health symptoms among healthcare workers worldwide. During the COVID-19 pandemic, the pooled prevalence rates of burnout, anxiety, depression, acute stress disorder and post-traumatic stress disorder among healthcare workers were 47%, 38%, 34%, 30% and 26%, respectively. These rates were higher than in the general population [200-202], suggesting that mental health risks were greater for healthcare workers during the pandemic.

Evaluation of 136 studies showed that the prevalence rate of anxiety among medical workers was 38%, higher than the 26.9% [200] and 20% [201] rates reported in the general population. The 134 studies that assessed depression reported a prevalence among healthcare workers of 34%, higher than that of 28% [200] and 30% [201] rates in the general population. Anxiety and depression among medical staff during COVID-19 were related to many factors, such as the shortage of personal protective equipment, the lack of other medical resources and the sacrifice of colleagues [5]. Most healthcare workers believed that, despite having adequate personal protective equipment, they



267 felt unsafe when contacting and treating patients. Moreover, they were also worried about their families becoming  
268 infected, especially if they take care of these infected patients, with the possibility that infection may spread to their  
269 families [4, 203]. This pandemic resulted in an unprecedented restructuring of the healthcare system, with a large  
270 number of medical staff, especially nurses, being transferred to intensive care units [204]. These workers had to absorb  
271 a lot of information and master new technical skills associated with unfamiliar areas of expertise in a short period of  
272 time, which could also lead to mental health disorders [205].

273 Few studies in a previous meta-analysis focused on job burnout of healthcare workers, our analysis showed that  
274 the combined prevalence rate of burnout among medical workers in 18 studies was 47%, higher than that of 37% in  
275 previous studies [18]. Job burnout among healthcare workers was high even before the pandemic [206]. During the  
276 pandemic, burnout was further exacerbated by long-term intense and stressful work, emotional exhaustion,  
277 deteriorating mental health, fear of infection and lack of support [207]. The increasing death toll of critically ill patients  
278 not only led to depression and pain among healthcare workers, but reduced their sense of professional achievement  
279 [208]. This not only had a negative impact on the physical and mental health and interpersonal relationships of  
280 medical personnel, but also affected their attitudes toward work and their efficiency. In addition, the present  
281 meta-analysis showed that the prevalence of acute stress disorder among health care workers was 30%, and the  
282 prevalence of PTSD was 26%, rates significantly higher than earlier in the pandemic [209].

283 When interpreting the pooled prevalence estimates calculated in this review and meta-analysis, it is need to note  
284 that the percentage of variability ( $I^2$ ) in the prevalence estimates due to heterogeneity was very high. When a large  
285 number of studies are included in meta-analyses, the  $I^2$  is extremely sensitive, while a high  $I^2$  is often inevitable [210].  
286 The  $I^2$  may therefore detect only a small amount of heterogeneity, which is not clinically important. Despite this, we  
287 discussed the heterogeneity through subgroup analysis. Although the subgroup analyses suggested evidence of  
288 between-group differences in prevalence estimates across a number of variables (e.g. data collection time, continent,  
289 evaluation tool), intra-group heterogeneity is still high and does not fully explain the existence of heterogeneity.

290 Our subgroup analysis found that the prevalence of anxiety remained at a high level in 2020 and 2021, and  
291 showed a significant downward trend in 2022. The prevalence rates of job burnout, depression, and post-traumatic  
292 stress disorder (PTSD) had consistently remained high, and there was an increasing trend in depression and PTSD,

293 which was consistent with previous research conducted on SARS [211]. PTSD has been evaluated infrequently in  
294 previous studies, as it usually occurs weeks or months after the acute stress disorder; that is, it appears later in the  
295 "repair phase" after the virus has been roughly controlled. In addition to having adverse psychological consequences,  
296 PTSD can lead to changes in a variety of physiological functions and have deleterious effects on multiple organ  
297 systems, especially increasing the risk of cardiovascular disease. Moreover, the presence of post-traumatic stress  
298 disorder (PTSD) among healthcare workers could potentially have detrimental effects on the healthcare system.  
299 Therefore, we suggest implementing screening measures and interventions for healthcare personnel [212,213]. The  
300 decline in the prevalence of anxiety may be due to the rapid and positive response of all countries and regions around  
301 the world after the pandemic, including expanding the production of medical supplies and calling on citizens to wear  
302 masks [214]. The major breakthrough in novel coronavirus's research has led to the successful research and  
303 development of vaccines [215] and the advent of drugs aimed at novel coronavirus [216], as well as the accumulated  
304 experience of medical staff and broad social support, which quickly stabilized the tense situation and reduced the  
305 negative impact of the pandemic.

306 However, it should be noted that the pandemic is not really over [217], and the continuous emergence of new  
307 virulent strains such as AY.4.2 [218] and XBB.1.5 [219], as well as changes in governments' pandemic prevention and  
308 control policies, may cause a new round of outbreaks at any time. Repeated psychological damage to health care  
309 workers will not only increase the risk of illness and lead to the deterioration of psychological disorders, but also lead  
310 to an increase in the prevalence and death of serious diseases [213]. Mental health disorders of medical staff are not as  
311 easy to detect as physical injuries, but they can also cause great pain to medical staff and damage the health care  
312 system and public safety [211]. Therefore, the prevention and control of the pandemic should not be taken lightly, and  
313 global leaders and all stakeholders should devote resources to the mental health of health care workers to screen for  
314 mental health problems and take effective interventions to help them solve their mental health disorders.

315 In addition, this study also has some limitations. Although seven major databases were searched, some of the  
316 other unsearched databases were still omitted and the search was mainly focused on English literature, and there  
317 were no grey literature. Secondly, during the pandemic, in order to clarify the biological characteristics of COVID-19  
318 virus and develop better diagnosis and treatment strategies, a large number of studies related to novel coronavirus

319 were carried out and published [220], but the quality of some of them was limited [221]. And most of the studies on  
320 the prevalence of mental disorders are cross-sectional studies, and the lower level of evidence in evidence-based  
321 medicine affects the credibility of the study [222]. Because different pandemic stages of each study lead to higher  
322 heterogeneity in the estimated prevalence rate, and different pandemic stages in different countries, there is no very  
323 ideal indicator to define different periods of the global epidemic. These also affect the accuracy of the survey results.

## 324 **5. Conclusions**

325 Following the outbreak of the COVID-19 pandemic, the prevalence rates of mental health disorder among  
326 healthcare workers worldwide increased significantly, resulting in serious damage to their physical and mental health.  
327 Although the pandemic has been brought under control, it has not really disappeared. Thus, future outbreaks may  
328 further aggravate mental health disorders in healthcare workers. In addition, later-occurring mental health disorders  
329 such as PTSD can have serious adverse consequences. Governments and relevant organizations should pay close  
330 attention to the mental health status of healthcare workers and implement intervention measures. Moreover,  
331 additional research is needed to better prevent and reduce mental health disorders among healthcare workers.

## 332 **Supporting information:**

333 **S1 File Retrieval strategy.**

334 **S2 File PRISMA statement and checklist (S1 Table).**

335 **S3 File Reasons for exclusion during full- text screening (S2 Table).**

336 **S4 File Main characteristics of the included studies (S3 Table).**

337 **S5 File Quality assessment (S4 and S5 Table).**

338 **S6 File Other subgroup analysis results (S1-S24 Figs).**

## 339 **Author Contributions:**

340 **Conceptualization:** J. Huang.

341 **Methodology:** J. Huang.

342 **Software:** J. Huang.

343 **Validation:** J. Huang., X.C. Sun. and Z.T. Huang.

344 **Formal analysis:** J. Huang.

345 **Investigation:** J. Huang., X.C. Sun. and Z.T. Huang.

346 **Resources:** J. Huang. and T.T.Chen.

347 **Data curation:** J. Huang. and Z.T. Huang.

348 **Writing—original draft preparation:** J. Huang.

349 **Writing—review and editing:** J. Huang. and X.T Wu.

350 **Visualization:** J. Huang. and Z.T. Huang.

351 **Supervision:** J. Huang.

352 **Project administration:** J. Huang.

353 **Funding acquisition:** J. Huang.

354 **All authors have read and agreed to the published version of the manuscript.**

## 355 **Funding:**

356 This research received no external funding

## 357 **Data Availability Statement:**

358 The data used in this meta-analysis are derived from previously published studies and are publicly available. The  
359 datasets analyzed during the current study are available in the references cited.

## 360 **Data citation:**

361 Please refer to the respective publications for the datasets used in this meta-analysis.

## 362 **Acknowledgments:**

363 The authors thank all the individuals who participated in this study.

## 364 **Conflicts of Interest:**

365 The authors declare no conflict of interest.

## 366 **References**

- 367 1. World Health Organization. (2020, January 9). WHO Statement Regarding Cluster of Pneumonia Cases in Wuhan, China.  
368 Retrieved January 11, 2020, from  
369 <https://www.who.int/china/news/detail/09-01-2020-who-statement-regarding-cluster-of-pneumonia-cases-in-wuhan-china>
- 370 2. World Health Organization. (2023). WHO Coronavirus COVID-19 Dashboard | WHO Coronavirus COVID-19 Dashboard  
371 With Vaccination Data. Retrieved from <https://covid19.who.int/>
- 372 3. Vignaud P, Prieto N. [Psychological impact of the COVID-19 pandemic on health care professionals]. *Actual Pharm.*  
373 2020;59(599):51-3. Epub 2020/08/31. doi: 10.1016/j.actpha.2020.08.013. PubMed PMID: 32863554; PubMed Central PMCID:  
374 PMC7441863.
- 375 4. Goulia P, Mantas C, Dimitroula D, Mantis D, Hyphantis T. General hospital staff worries, perceived sufficiency of information  
376 and associated psychological distress during the A/H1N1 influenza pandemic. *BMC infectious diseases.* 2010;10:322. Epub  
377 2010/11/11. doi: 10.1186/1471-2334-10-322. PubMed PMID: 21062471; PubMed Central PMCID: PMC7441863.

- 378 5. Hall H. The effect of the COVID-19 pandemic on healthcare workers' mental health. *JAAPA : official journal of the American*  
379 *Academy of Physician Assistants.* 2020;33(7):45-8. Epub 2020/06/27. doi: 10.1097/01.JAA.0000669772.78848.8c. PubMed PMID:  
380 32590533.
- 381 6. Santolalla-Arnedo I, Pozo-Herce PD, De Viñaspre-Hernandez RR, Gea-Caballero V, Juarez-Vela R, Gil-Fernandez G, et al.  
382 Psychological impact on care professionals due to the SARS-Cov-2 virus in Spain. *International nursing review.*  
383 2022;69(4):520-8. Epub 2022/02/03. doi: 10.1111/inr.12748. PubMed PMID: 35107171; PubMed Central PMCID:  
384 PMCPMC9790592.
- 385 7. Del Pozo-Herce P, Garrido-García R, Santolalla-Arnedo I, Gea-Caballero V, García-Molina P, Ruiz de Viñaspre-Hernández R,  
386 et al. Psychological Impact on the Nursing Professionals of the Rioja Health Service (Spain) Due to the SARS-CoV-2 Virus.  
387 *International journal of environmental research and public health.* 2021;18(2). Epub 2021/01/16. doi: 10.3390/ijerph18020580.  
388 PubMed PMID: 33445563; PubMed Central PMCID: PMCPMC7827934.
- 389 8. Chong MY, Wang WC, Hsieh WC, Lee CY, Chiu NM, Yeh WC, et al. Psychological impact of severe acute respiratory  
390 syndrome on health workers in a tertiary hospital. *The British journal of psychiatry : the journal of mental science.*  
391 2004;185:127-33. Epub 2004/08/03. doi: 10.1192/bjp.185.2.127. PubMed PMID: 15286063.
- 392 9. Lee AM, Wong JG, McAlonan GM, Cheung V, Cheung C, Sham PC, et al. Stress and psychological distress among SARS  
393 survivors 1 year after the outbreak. *Canadian journal of psychiatry Revue canadienne de psychiatrie.* 2007;52(4):233-40. Epub  
394 2007/05/16. doi: 10.1177/070674370705200405. PubMed PMID: 17500304.
- 395 10. Anjum S, Ullah R, Rana MS, Khan HA, Memon FS, Ahmed Y, et al. COVID-19 Pandemic: A Serious Threat for Public Mental  
396 Health Globally. *Psychiatria Danubina.* 2020;32(2):245-50. Epub 2020/08/17. doi: 10.24869/psyd.2020.245. PubMed PMID:  
397 32796793.
- 398 11. Xiong J, Lipsitz O, Nasri F, Lui LMW, Gill H, Phan L, et al. Impact of COVID-19 pandemic on mental health in the general  
399 population: A systematic review. *Journal of affective disorders.* 2020;277:55-64. Epub 2020/08/18. doi: 10.1016/j.jad.2020.08.001.  
400 PubMed PMID: 32799105; PubMed Central PMCID: PMCPMC7413844.
- 401 12. Bohórquez-Blanco S, Allande-Cussó R, Martín-López C, Gómez-Salgado J, García-Iglesias JJ, Fagundo-Rivera J, et al. Effects of  
402 the COVID-19 pandemic on the mental health of rehabilitation area professionals: A systematic review. *Frontiers in public*  
403 *health.* 2022;10:1085820. Epub 2022/12/27. doi: 10.3389/fpubh.2022.1085820. PubMed PMID: 36568762; PubMed Central  
404 PMCID: PMCPMC9779931.
- 405 13. Gourret Baumgart J, Kane H, El-Hage W, Deloyer J, Maes C, Lebas MC, et al. The Early Impacts of the COVID-19 Pandemic  
406 on Mental Health Facilities and Psychiatric Professionals. *International journal of environmental research and public health.*  
407 2021;18(15). Epub 2021/08/08. doi: 10.3390/ijerph18158034. PubMed PMID: 34360334; PubMed Central PMCID:  
408 PMCPMC8345711.
- 409 14. Paiano M, Jaques AE, Nacamura PAB, Salci MA, Radovanovic CAT, Carreira L. Mental health of healthcare professionals in  
410 China during the new coronavirus pandemic: an integrative review. *Revista brasileira de enfermagem.* 2020;73(suppl  
411 2):e20200338. Epub 2020/09/24. doi: 10.1590/0034-7167-2020-0338. PubMed PMID: 32965402.
- 412 15. Deng J, Zhou F, Hou W, Silver Z, Wong CY, Chang O, et al. The prevalence of depression, anxiety, and sleep disturbances in  
413 COVID-19 patients: a meta-analysis. *Annals of the New York Academy of Sciences.* 2021;1486(1):90-111. Epub 2020/10/04. doi:  
414 10.1111/nyas.14506. PubMed PMID: 33009668; PubMed Central PMCID: PMCPMC7675607.
- 415 16. Hill JE, Harris C, Danielle LC, Boland P, Doherty AJ, Benedetto V, et al. The prevalence of mental health conditions in  
416 healthcare workers during and after a pandemic: Systematic review and meta-analysis. *Journal of advanced nursing.*  
417 2022;78(6):1551-73. Epub 2022/02/13. doi: 10.1111/jan.15175. PubMed PMID: 35150151; PubMed Central PMCID:  
418 PMCPMC9111784.
- 419 17. Saragih ID, Tonapa SI, Saragih IS, Advani S, Batubara SO, Suarilah I, et al. Global prevalence of mental health problems  
420 among healthcare workers during the Covid-19 pandemic: A systematic review and meta-analysis. *International journal of*  
421 *nursing studies.* 2021;121:104002. Epub 2021/07/17. doi: 10.1016/j.ijnurstu.2021.104002. PubMed PMID: 34271460; PubMed  
422 Central PMCID: PMCPMC9701545.
- 423 18. Aymerich C, Pedruzo B, Pérez JL, Laborda M, Herrero J, Blanco J, et al. COVID-19 pandemic effects on health worker's mental  
424 health: Systematic review and meta-analysis. *European psychiatry : the journal of the Association of European Psychiatrists.*  
425 2022;65(1):e10. Epub 2022/01/22. doi: 10.1192/j.eurpsy.2022.1. PubMed PMID: 35060458; PubMed Central PMCID:  
426 PMCPMC8828390.
- 427 19. Li Y, Scherer N, Felix L, Kuper H. Prevalence of depression, anxiety and post-traumatic stress disorder in health care workers  
428 during the COVID-19 pandemic: A systematic review and meta-analysis. *PloS one.* 2021;16(3):e0246454. Epub 2021/03/11. doi:  
429 10.1371/journal.pone.0246454. PubMed PMID: 33690641; PubMed Central PMCID: PMCPMC7946321.
- 430 20. Lee BEC, Ling M, Boyd L, Olsson C, Sheen J. The prevalence of probable mental health disorders among hospital healthcare  
431 workers during COVID-19: A systematic review and meta-analysis. *Journal of affective disorders.* 2023;330:329-45. Epub  
432 2023/03/18. doi: 10.1016/j.jad.2023.03.012. PubMed PMID: 36931567; PubMed Central PMCID: PMCPMC10017178.
- 433 21. Moher, D., Liberati, A., Tetzlaff, J., Altman, D. G., & PRISMA Group (2009). Preferred reporting items for systematic  
434 reviews and meta-analyses: the PRISMA statement. *PLoS medicine*, 6(7), e1000097.  
435 <https://doi.org/10.1371/journal.pmed.1000097>

- 436 22. Viswanathan M, Ansari MT, Berkman ND, Chang S, Hartling L, McPheeters M, et al. AHRQ Methods for Effective Health  
437 Care
- 438 23. Assessing the Risk of Bias of Individual Studies in Systematic Reviews of Health Care Interventions. *Methods Guide for*  
439 *Effectiveness and Comparative Effectiveness Reviews*. Rockville (MD): Agency for Healthcare Research and Quality (US);  
440 2008.
- 441 24. Stang A. Critical evaluation of the Newcastle-Ottawa scale for the assessment of the quality of nonrandomized studies in  
442 meta-analyses. *Eur J Epidemiol*. 2010;25(9):603-5. Epub 2010/07/24. doi: 10.1007/s10654-010-9491-z. PubMed PMID: 20652370.
- 443 25. Nyaga VN, Arbyn M, Aerts M. Metaprop: a Stata command to perform meta-analysis of binomial data. *Archives of public*  
444 *health = Archives belges de sante publique*. 2014;72(1):39. Epub 2014/01/01. doi: 10.1186/2049-3258-72-39. PubMed PMID:  
445 25810908; PubMed Central PMCID: PMCPMC4373114.
- 446 26. Roser M. Human Development Index (HDI). *Our World in Data*. 2014. Available from:  
447 <https://ourworldindata.org/human-development-index>
- 448 27. Huedo-Medina TB, Sánchez-Meca J, Marin-Martínez F, Botella J. Assessing heterogeneity in meta-analysis: Q statistic or I2  
449 index? *Psychological methods*. 2006;11(2):193-206. Epub 2006/06/21. doi: 10.1037/1082-989x.11.2.193. PubMed PMID: 16784338.
- 450 28. Dolan ED, Mohr D, Lempa M, Joos S, Fihn SD, Nelson KM, et al. Using a single item to measure burnout in primary care staff:  
451 a psychometric evaluation. *Journal of general internal medicine*. 2015;30(5):582-7. Epub 2014/12/03. doi:  
452 10.1007/s11606-014-3112-6. PubMed PMID: 25451989; PubMed Central PMCID: PMCPMC4395610.
- 453 29. Spitzer RL, Kroenke K, Williams JB, Löwe B. A brief measure for assessing generalized anxiety disorder: the GAD-7. *Archives*  
454 *of internal medicine*. 2006;166(10):1092-7. Epub 2006/05/24. doi: 10.1001/archinte.166.10.1092. PubMed PMID: 16717171.
- 455 30. Guillén-Riquelme A, Buela-Casal G. [Meta-analysis of group comparison and meta-analysis of reliability generalization of the  
456 State-Trait Anxiety Inventory Questionnaire (STAI)]. *Revista espanola de salud publica*. 2014;88(1):101-12. Epub 2014/04/15.  
457 doi: 10.4321/s1135-57272014000100007. PubMed PMID: 24728394.
- 458 31. Sereda Y, Dembitskiy S. Validity assessment of the symptom checklist SCL-90-R and shortened versions for the general  
459 population in Ukraine. *BMC psychiatry*. 2016;16(1):300. Epub 2016/08/27. doi: 10.1186/s12888-016-1014-3. PubMed PMID:  
460 27561313; PubMed Central PMCID: PMCPMC5000449.
- 461 32. Kroenke K, Spitzer RL, Williams JB. The PHQ-9: validity of a brief depression severity measure. *Journal of general internal*  
462 *medicine*. 2001;16(9):606-13. Epub 2001/09/15. doi: 10.1046/j.1525-1497.2001.016009606.x. PubMed PMID: 11556941; PubMed  
463 Central PMCID: PMCPMC1495268.
- 464 33. Tritt K, von Heymann F, Zaudig M, Zacharias I, Söllner W, Loew T. [Development of the "ICD-10-Symptom-Rating"(ISR)  
465 questionnaire]. *Zeitschrift fur Psychosomatische Medizin und Psychotherapie*. 2008;54(4):409-18. Epub 2008/12/04. doi:  
466 10.13109/zptm.2008.54.4.409. PubMed PMID: 19049690.
- 467 34. Fischer HF, Tritt K, Klapp BF, Fliege H. [Factor structure and psychometric properties of the ICD-10-Symptom-Rating (ISR) in  
468 samples of psychosomatic patients]. *Psychotherapie, Psychosomatik, medizinische Psychologie*. 2010;60(8):307-15. Epub  
469 2009/04/29. doi: 10.1055/s-0029-1214419. PubMed PMID: 19399700.
- 470 35. Cardeña E, Koopman C, Classen C, Waelde LC, Spiegel D. Psychometric properties of the Stanford Acute Stress Reaction  
471 Questionnaire (SASRQ): a valid and reliable measure of acute stress. *J Trauma Stress*. 2000;13(4):719-34. Epub 2000/01/11. doi:  
472 10.1023/a:1007822603186. PubMed PMID: 11109242.
- 473 36. Creamer M, Bell R, Failla S. Psychometric properties of the Impact of Event Scale - Revised. *Behav Res Ther*.  
474 2003;41(12):1489-96. Epub 2004/01/07. doi: 10.1016/j.brat.2003.07.010. PubMed PMID: 14705607.
- 475 37. Wang R, Wang L, Zhang J, Liu Z, Wu K. The structure of acute stress disorder among Chinese adults exposed to an  
476 earthquake: is dysphoric arousal a unique construct of acute posttraumatic responses? *Scandinavian journal of psychology*.  
477 2012;53(5):430-6. Epub 2012/08/14. doi: 10.1111/j.1467-9450.2012.00965.x. PubMed PMID: 22882702.
- 478 38. Nochaiwong S, Ruengorn C, Thavorn K, Hutton B, Awiphan R, Phosuya C, et al. Global prevalence of mental health issues  
479 among the general population during the coronavirus disease-2019 pandemic: a systematic review and meta-analysis.  
480 *Scientific reports*. 2021;11(1):10173. Epub 2021/05/15. doi: 10.1038/s41598-021-89700-8. PubMed PMID: 33986414; PubMed  
481 Central PMCID: PMCPMC8119461.
- 482 39. Alzahrani F, Alshahrani NZ, Abu Sabah A, Zarbah A, Abu Sabah S, Mamun MA. Prevalence and factors associated with  
483 mental health problems in Saudi general population during the coronavirus disease 2019 pandemic: A systematic review and  
484 meta-analysis. *PsyCh journal*. 2022;11(1):18-29. Epub 2022/01/06. doi: 10.1002/pchj.516. PubMed PMID: 34986503.
- 485 40. Shi L, Lu ZA, Que JY, Huang XL, Liu L, Ran MS, et al. Prevalence of and Risk Factors Associated With Mental Health  
486 Symptoms Among the General Population in China During the Coronavirus Disease 2019 Pandemic. *JAMA network open*.  
487 2020;3(7):e2014053. Epub 2020/07/02. doi: 10.1001/jamanetworkopen.2020.14053. PubMed PMID: 32609353; PubMed Central  
488 PMCID: PMCPMC7330717.
- 489 41. Usul E, Şan I, Bekgöz B. The Effect of the COVID-19 Pandemic on the Anxiety Level of Emergency Medical Services  
490 Professionals. *Psychiatria Danubina*. 2020;32(3-4):563-9. Epub 2020/12/29. doi: 10.24869/psyd.2020.563. PubMed PMID:  
491 33370767.

- 492 42. El-Hage W, Hingray C, Lemogne C, Yroni A, Brunault P, Bienvenu T, et al. [Health professionals facing the coronavirus  
493 disease 2019 (COVID-19) pandemic: What are the mental health risks?]. *L'Encephale*. 2020;46(3s):S73-s80. Epub 2020/05/07. doi:  
494 10.1016/j.encep.2020.04.008. PubMed PMID: 32370984; PubMed Central PMCID: PMCPMC7174182.
- 495 43. Zhu N, Zhang D, Wang W, Li X, Yang B, Song J, et al. A Novel Coronavirus from Patients with Pneumonia in China, 2019.  
496 *The New England journal of medicine*. 2020;382(8):727-33. Epub 2020/01/25. doi: 10.1056/NEJMoa2001017. PubMed PMID:  
497 31978945; PubMed Central PMCID: PMCPMC7092803.
- 498 44. Rodrigues H, Cobucci R, Oliveira A, Cabral JV, Medeiros L, Gurgel K, et al. Burnout syndrome among medical residents: A  
499 systematic review and meta-analysis. *PloS one*. 2018;13(11):e0206840. Epub 2018/11/13. doi: 10.1371/journal.pone.0206840.  
500 PubMed PMID: 30418984; PubMed Central PMCID: PMCPMC6231624.
- 501 45. Giusti EM, Pedroli E, D'Aniello GE, Stramba Badiale C, Pietrabissa G, Manna C, et al. The Psychological Impact of the  
502 COVID-19 Outbreak on Health Professionals: A Cross-Sectional Study. *Front Psychol*. 2020;11:1684. Epub 2020/08/06. doi:  
503 10.3389/fpsyg.2020.01684. PubMed PMID: 32754102; PubMed Central PMCID: PMCPMC7366071.
- 504 46. Chahraoui K, Bioy A, Cras E, Gilles F, Laurent A, Valache B, et al. [Psychological experience of health care professionals in  
505 intensive care unit: a qualitative and exploratory study]. *Annales francaises d'anesthesie et de reanimation*. 2011;30(4):342-8.  
506 Epub 2011/03/18. doi: 10.1016/j.annfar.2011.01.020. PubMed PMID: 21411265.
- 507 47. Krishnamoorthy Y, Nagarajan R, Saya GK, Menon V. Prevalence of psychological morbidities among general population,  
508 healthcare workers and COVID-19 patients amidst the COVID-19 pandemic: A systematic review and meta-analysis.  
509 *Psychiatry research*. 2020;293:113382. Epub 2020/08/24. doi: 10.1016/j.psychres.2020.113382. PubMed PMID: 32829073;  
510 PubMed Central PMCID: PMCPMC7417292.
- 511 48. Borges Migliavaca C, Stein C, Colpani V, Barker TH, Munn Z, Falavigna M. How are systematic reviews of prevalence  
512 conducted? A methodological study. *BMC medical research methodology*. 2020;20(1):96. Epub 2020/04/28. doi:  
513 10.1186/s12874-020-00975-3. PubMed PMID: 32336279; PubMed Central PMCID: PMCPMC7184711.
- 514 49. Brudey C, Park J, Wiaderkiewicz J, Kobayashi I, Mellman TA, Marvar PJ. Autonomic and inflammatory consequences of  
515 posttraumatic stress disorder and the link to cardiovascular disease. *American journal of physiology Regulatory, integrative  
516 and comparative physiology*. 2015;309(4):R315-21. Epub 2015/06/13. doi: 10.1152/ajpregu.00343.2014. PubMed PMID: 26062635;  
517 PubMed Central PMCID: PMCPMC4538229.
- 518 50. Vandepitte S, Alleman T, Nopens I, Baetens J, Coenen S, De Smedt D. Cost-Effectiveness of COVID-19 Policy Measures: A  
519 Systematic Review. *Value in health : the journal of the International Society for Pharmacoeconomics and Outcomes Research*.  
520 2021;24(11):1551-69. Epub 2021/10/30. doi: 10.1016/j.jval.2021.05.013. PubMed PMID: 34711355; PubMed Central PMCID:  
521 PMCPMC8481648.
- 522 51. Wen W, Chen C, Tang J, Wang C, Zhou M, Cheng Y, et al. Efficacy and safety of three new oral antiviral treatment  
523 (molnupiravir, fluvoxamine and Paxlovid) for COVID-19 : a meta-analysis. *Annals of medicine*. 2022;54(1):516-23. Epub  
524 2022/02/05. doi: 10.1080/07853890.2022.2034936. PubMed PMID: 35118917; PubMed Central PMCID: PMCPMC8820829.
- 525 52. Angeletti S, Giovanetti M, Fogolari M, Cella E, De Florio L, Lintas C, et al. SARS-CoV-2 AY.4.2 variant circulating in Italy:  
526 Genomic preliminary insight. *Journal of medical virology*. 2022;94(4):1689-92. Epub 2021/11/13. doi: 10.1002/jmv.27451.  
527 PubMed PMID: 34766651; PubMed Central PMCID: PMCPMC8661725.
- 528 53. Parums DV. Editorial: The XBB.1.5 ('Kraken') Subvariant of Omicron SARS-CoV-2 and its Rapid Global Spread. *Medical  
529 science monitor : international medical journal of experimental and clinical research*. 2023;29:e939580. Epub 2023/02/02. doi:  
530 10.12659/msm.939580. PubMed PMID: 36722047; PubMed Central PMCID: PMCPMC9901170.
- 531 54. Chen Q, Allot A, Lu Z. Keep up with the latest coronavirus research. *Nature*. 2020;579(7798):193. Epub 2020/03/12. doi:  
532 10.1038/d41586-020-00694-1. PubMed PMID: 32157233.
- 533 55. Jung RG, Di Santo P, Clifford C, Prosperi-Porta G, Skanes S, Hung A, et al. Methodological quality of COVID-19 clinical  
534 research. *Nat Commun*. 2021;12(1):943. Epub 2021/02/13. doi: 10.1038/s41467-021-21220-5. PubMed PMID: 33574258; PubMed  
535 Central PMCID: PMCPMC7878793 Scientific and Edwards Lifesciences outside of the submitted work. The remaining authors  
536 declare no competing interests.
- 537 56. Burns PB, Rohrich RJ, Chung KC. The levels of evidence and their role in evidence-based medicine. *Plast Reconstr Surg*.  
538 2011;128(1):305-10. Epub 2011/06/28. doi: 10.1097/PRS.0b013e318219c171. PubMed PMID: 21701348; PubMed Central PMCID:  
539 PMCPMC3124652.
- 540 57. Abu-Elenin MM. Immediate psychological outcomes associated with COVID-19 pandemic in frontline physicians: a  
541 cross-sectional study in Egypt. *BMC psychiatry*. 2021;21(1). doi: 10.1186/s12888-021-03225-y.
- 542 58. AlAteeq DA, Aljhani S, Althiyabi I, Majzoub S. Mental health among healthcare providers during coronavirus disease  
543 (COVID-19) outbreak in Saudi Arabia. *Journal of infection and public health*. 2020;13(10):1432-7. Epub 2020/09/17. doi:  
544 10.1016/j.jiph.2020.08.013. PubMed PMID: 32933881; PubMed Central PMCID: PMCPMC7834809.
- 545 59. Ali S, Maguire S, Marks E, Doyle M, Sheehy C. Psychological impact of the COVID-19 pandemic on healthcare workers at  
546 acute hospital settings in the South-East of Ireland: an observational cohort multicentre study. *BMJ open*. 2020;10(12):e042930.  
547 Epub 2020/12/30. doi: 10.1136/bmjopen-2020-042930. PubMed PMID: 33371046; PubMed Central PMCID: PMCPMC7750872.

- 548 60. AlKandari S, Salman A, Al-Ghadban F, Ahmad R. A Cross-Sectional Study to Examine the Psychological Impact of the  
549 COVID-19 Pandemic on Healthcare Workers in Kuwait. *International journal of environmental research and public health*.  
550 2022;19(17). doi: 10.3390/ijerph191710464.
- 551 61. Alkhamees AA, Assiri H, Alharbi HY, Nasser A, Alkhamees MA. Burnout and depression among psychiatry residents during  
552 COVID-19 pandemic. *Human resources for health*. 2021;19(1):46. Epub 2021/04/08. doi: 10.1186/s12960-021-00584-1. PubMed  
553 PMID: 33823857; PubMed Central PMCID: PMCPCMC8022305.
- 554 62. Almalki AH, Alzahrani MS, Alshehri FS, Alharbi A, Alkhudaydi SF, Alshahrani RS, et al. The Psychological Impact of  
555 COVID-19 on Healthcare Workers in Saudi Arabia: A Year Later Into the Pandemic. *Frontiers in Psychiatry*. 2021;12. doi:  
556 10.3389/fpsy.2021.797545.
- 557 63. Alzahrani NS, Almarwani AM, Asiri SA, Alharbi HF, Alhowaymel FM. Factors influencing hospital anxiety and depression  
558 among emergency department nurses during the COVID-19 pandemic: A multi-center cross-sectional study. *Frontiers in*  
559 *Psychiatry*. 2022;13. doi: 10.3389/fpsy.2022.912157.
- 560 64. Andlib S, Inayat S, Azhar K, Aziz F. Burnout and psychological distress among Pakistani nurses providing care to COVID-19  
561 patients: A cross-sectional study. *International nursing review*. 2022. doi: 10.1111/inr.12750.
- 562 65. Arshad AR, Islam F. COVID-19 and Anxiety amongst Doctors: A Pakistani Perspective. *Journal of the College of Physicians*  
563 *and Surgeons Pakistan*. 2020;30(2):S106-S9. doi: 10.29271/JCPSP.2020.SUPP2.106.
- 564 66. Ashoor MM, Almulhem NJ, AlMubarak ZA, Alrahim AA, Alshammari SM, Alzahrani FS, et al. The psychological impact of  
565 the COVID-19 pandemic on otolaryngologists: Should we be concerned? *Laryngoscope Investigative Otolaryngology*.  
566 2021;6(3):576-85. doi: 10.1002/lio.2.556.
- 567 67. Awano N, Oyama N, Akiyama K, Inomata M, Kuse N, Tone M, et al. Anxiety, Depression, and Resilience of Healthcare  
568 Workers in Japan During the Coronavirus Disease 2019 Outbreak. *Internal medicine (Tokyo, Japan)*. 2020;59(21):2693-9. Epub  
569 2020/11/03. doi: 10.2169/internalmedicine.5694-20. PubMed PMID: 33132305; PubMed Central PMCID: PMCPCMC7691033.
- 570 68. Azizi M, Kamali M, Moosazadeh M, Aarabi M, Ghasemian R, Hasannezhad Reskati M, et al. Assessing mental health status  
571 among Iranian healthcare workers in times of the COVID-19 pandemic: A web-based cross-sectional study. *Brain and*  
572 *behavior*. 2021;11(8). doi: 10.1002/brb3.2304.
- 573 69. Azoulay E, Pochard F, Reignier J, Argaud L, Bruneel F, Courbon P, et al. Symptoms of Mental Health Disorders in Critical  
574 Care Physicians Facing the Second COVID-19 Wave: A Cross-Sectional Study. *Chest*. 2021;160(3):944-55. doi:  
575 10.1016/j.chest.2021.05.023. PubMed PMID: MEDLINE:34023323.
- 576 70. Babamiri M, Bashirian S, Khazaei S, Sohrabi MS, Heidari-moghadam R, Morteza-poor A, et al. Burnout and Mental Health of  
577 COVID-19 Frontline Healthcare Workers: Results from an Online Survey. *Iranian Journal of Psychiatry*. 2022;17(2):136-43. doi:  
578 10.18502/ijps.v17i2.8903.
- 579 71. Baminiwatta A, De Silva S, Hapangama A, Basnayake K, Abayaweera C, Kulasinghe D, et al. Impact of COVID-19 on the  
580 mental health of frontline and non-frontline healthcare workers in Sri Lanka. *The Ceylon medical journal*. 2021;66(1):16-31.  
581 Epub 2022/01/06. doi: 10.4038/cmj.v66i1.9351. PubMed PMID: 34983177.
- 582 72. Cahill AG, Olshavsky ME, Newport DJ, Benzer J, Chambers KM, Custer J, et al. Occupational Risk Factors and Mental Health  
583 Among Frontline Health Care Workers in a Large US Metropolitan Area During the COVID-19 Pandemic. The primary care  
584 companion for CNS disorders. 2022;24(2). Epub 2022/03/12. doi: 10.4088/PCC.21m03166. PubMed PMID: 35276759.
- 585 73. Çalışkan F, Dost B. The evaluation of knowledge, attitudes, depression and anxiety levels among emergency physicians  
586 during the COVID-19 pandemic. *Signa Vitae*. 2020;16(1):163-71. doi: 10.22514/sv.2020.16.0022.
- 587 74. Carmassi C, Dell'Oste V, Barberi FM, Bertelloni CA, Pedrinelli V, Dell'Osso L. Mental Health Symptoms among General  
588 Practitioners Facing the Acute Phase of the COVID-19 Pandemic: Detecting Different Reaction Groups. *International journal*  
589 *of environmental research and public health*. 2022;19(7). Epub 2022/04/13. doi: 10.3390/ijerph19074007. PubMed PMID:  
590 35409690; PubMed Central PMCID: PMCPCMC8998411.
- 591 75. Carriero MC, Conte L, Calignano M, Lupo R, Calabrò A, Santoro P, et al. The psychological impact of the Coronavirus  
592 emergency on physicians and nurses: An Italian observational study. *Acta Biomedica*. 2021;92. doi:  
593 10.23750/ABM.V92IS2.11575.
- 594 76. Chatterjee SS, Bhattacharyya R, Bhattacharyya S, Gupta S, Das S, Banerjee BB. Attitude, practice, behavior, and mental health  
595 impact of COVID-19 on doctors. *Indian Journal of Psychiatry*. 2020;62(3):257-65. doi:  
596 10.4103/psychiatry.IndianJPsychiatry\_333\_20.
- 597 77. Chatzittofis A, Karanikola M, Michailidou K, Constantinidou A. Impact of the COVID-19 Pandemic on the Mental Health of  
598 Healthcare Workers. *International journal of environmental research and public health*. 2021;18(4). Epub 2021/02/07. doi:  
599 10.3390/ijerph18041435. PubMed PMID: 33546513; PubMed Central PMCID: PMCPCMC7913751.
- 600 78. Chen J, Liu X, Wang D, Jin Y, He M, Ma Y, et al. Risk factors for depression and anxiety in healthcare workers deployed  
601 during the COVID-19 outbreak in China. *Social psychiatry and psychiatric epidemiology*. 2021;56(1):47-55. doi:  
602 10.1007/s00127-020-01954-1.
- 603 79. Chen L, Lin D, Feng H. An Investigation of Mental Health Status Among Medical Staff Following COVID-19 Outbreaks: A  
604 Cross-Sectional Study. *Medical science monitor : international medical journal of experimental and clinical research*.



- 2021;27:e929454. Epub 2021/07/01. doi: 10.12659/msm.929454. PubMed PMID: 34188013; PubMed Central PMCID: PMC8256688.
80. Chen X, Arber A, Gao J, Zhang L, Ji M, Wang D, et al. The mental health status among nurses from low-risk areas under normalized COVID-19 pandemic prevention and control in China: A cross-sectional study. *International journal of mental health nursing*. 2021;30(4):975-87. doi: 10.1111/inm.12852. PubMed PMID: 151433613. Language: English. Entry Date: 20210720. Revision Date: 20220801. Publication Type: Article.
81. Chinvararak C, Kerdcharoen N, Pruttithavorn W, Polruamngern N, Asawaroekwisoot T, Munsukpol W, et al. Mental health among healthcare workers during COVID-19 pandemic in Thailand. *PloS one*. 2022;17(5):e0268704. Epub 2022/05/21. doi: 10.1371/journal.pone.0268704. PubMed PMID: 35594261; PubMed Central PMCID: PMC9122199.
82. Civantos AM, Bertelli A, Gonçalves A, Getzen E, Chang C, Long Q, et al. Mental health among head and neck surgeons in Brazil during the COVID-19 pandemic: A national study. *American Journal of Otolaryngology - Head and Neck Medicine and Surgery*. 2020;41(6). doi: 10.1016/j.amjoto.2020.102694.
83. Çölkesen F, Çölkesen F. The effects of COVID-19 pandemic on the mental health of healthcare workers and recommendations for preventing loss of work efficiency. *Erciyes Medical Journal*. 2021;43(6):560-5. doi: 10.14744/etd.2021.03453.
84. Czepiel D, Hoek HW, van der Markt A, Rutten BPF, Veling W, Schirmbeck F, et al. The Association Between Exposure to COVID-19 and Mental Health Outcomes Among Healthcare Workers. *Frontiers in public health*. 2022;10:896843. Epub 2022/06/28. doi: 10.3389/fpubh.2022.896843. PubMed PMID: 35757645; PubMed Central PMCID: PMC9226479.
85. d'Ussel M, Fels A, Durand X, Lemogne C, Chatellier G, Castreau N, et al. Factors associated with psychological symptoms in hospital workers of a French hospital during the COVID-19 pandemic: Lessons from the first wave. *PloS one*. 2022;17(4 April). doi: 10.1371/journal.pone.0267032.
86. Da'seh A, Obaid O, Rababa M. Psychological impact of coronavirus disease on nurses exposed and non-exposed to disease. *International Journal of Africa Nursing Sciences*. 2022;17. doi: 10.1016/j.ijans.2022.100442.
87. Dobson H, Malpas CB, Burrell AJC, Gurvich C, Chen L, Kulkarni J, et al. Burnout and psychological distress amongst Australian healthcare workers during the COVID-19 pandemic. *Australasian Psychiatry*. 2021;29(1):26-30. doi: 10.1177/1039856220965045.
88. Etesam F, Bafrani MA, Akbarpour S, Tarighatnia H, Rajabi G, Dolatshahi M, et al. Depression, Anxiety and Coping Responses among Iranian Healthcare Professionals during the Coronavirus Disease (COVID-19) Outbreak. *Iranian Journal of Psychiatry*. 2022;17(4):446-54. doi: 10.18502/ijps.v17i4.10694.
89. Frajerman A, Colle R, Hozer F, Deflesselle E, Rotenberg S, Chappell K, et al. Psychological distress among outpatient physicians in private practice linked to COVID-19 and related mental health during the second lockdown. *Journal of psychiatric research*. 2022;151:50-6. doi: 10.1016/j.jpsychires.2022.04.003. PubMed PMID: MEDLINE:35447507.
90. Fu M, Han D, Xu M, Mao C, Wang D. The psychological impact of anxiety and depression on Chinese medical staff during the outbreak of the COVID-19 pandemic: a cross-sectional study. *Annals of palliative medicine*. 2021;10(7):7759-74. doi: 10.21037/apm-21-1261.
91. GebreEyesus FA, Tarekegn TT, Amlak BT, Shiferaw BZ, Emeria MS, Geleta OT, et al. Levels and predictors of anxiety, depression, and stress during COVID-19 pandemic among frontline healthcare providers in Gurage zonal public hospitals, Southwest Ethiopia, 2020: A multicenter cross-sectional study. *PloS one*. 2021;16(11 November). doi: 10.1371/journal.pone.0259906.
92. Gilleen J, Santaolalla A, Valdearenas L, Salice C, Fusté M. Impact of the COVID-19 pandemic on the mental health and well-being of UK healthcare workers. *BJPsych Open*. 2021;7(3). doi: 10.1192/bjo.2021.42.
93. Goh ET, Denning M, Purkayastha S, Kinross J. Determinants of psychological well-being in healthcare workers during the covid-19 pandemic: A multinational cross-sectional study. *British Journal of Surgery*. 2021;108(SUPPL 2):ii23. doi: 10.1093/bjs/znab134.043.
94. Gonzalo RM, Ana RG, Patricia CA, Laura AL, Nathalia GT, Luis C, et al. Short-term emotional impact of COVID-19 pandemic on Spaniard health workers. *Journal of affective disorders*. 2021;278:390-4. doi: 10.1016/j.jad.2020.09.079.
95. Greenberg N, Weston D, Hall C, Caulfield T, Williamson V, Fong K. Mental health of staff working in intensive care during Covid-19. *Occupational medicine (Oxford, England)*. 2021;71(2):62-7. Epub 2021/01/13. doi: 10.1093/occmed/kqaa220. PubMed PMID: 33434920; PubMed Central PMCID: PMC9122199.
96. Guo WP, Min Q, Gu WW, Yu L, Xiao X, Yi WB, et al. Prevalence of mental health problems in frontline healthcare workers after the first outbreak of COVID-19 in China: a cross-sectional study. *Health and Quality of Life Outcomes*. 2021;19(1). doi: 10.1186/s12955-021-01743-7.
97. Habtamu Y, Admasu K, Tullu M, Damene W, Birhanu A, Beyero T, et al. Mental Health Outcomes among Frontline Health-Care Workers at Eka Kotebe National COVID-19 Treatment Center, Addis Ababa, Ethiopia, 2020: A Cross-Sectional Study. *Neuropsychiatric Disease and Treatment*. 2021;17:2831-40. doi: 10.2147/NDT.S311949.
98. Hayat K, Arshed M, Fiaz I, Afreen U, Khan FU, Khan TA, et al. Impact of COVID-19 on the Mental Health of Healthcare Workers: A Cross-Sectional Study From Pakistan. *Frontiers in public health*. 2021;9:603602. Epub 2021/05/14. doi: 10.3389/fpubh.2021.603602. PubMed PMID: 33981657; PubMed Central PMCID: PMC8107369.

- 662 99. He L, Wang J, Zhang L, Wang F, Dong W, Zhao W. Risk Factors for Anxiety and Depressive Symptoms in Doctors During the  
663 Coronavirus Disease 2019 Pandemic. *Frontiers in Psychiatry*. 2021;12. doi: 10.3389/fpsy.2021.687440.
- 664 100. Heesakkers H, Zegers M, van Mol MMC, van den Boogaard M. Mental well-being of intensive care unit nurses after the  
665 second surge of the COVID-19 pandemic: A cross-sectional and longitudinal study. *Intensive & critical care nursing*.  
666 2022;103313. doi: 10.1016/j.iccn.2022.103313.
- 667 101. Hickling MT, Barnett SD. Psychological impact of COVID-19 on nursing personnel: A regional online survey. *Journal of*  
668 *advanced nursing*. 2022;78(9):3025-33. doi: 10.1111/jan.15339. PubMed PMID: WOS:000819350400001.
- 669 102. Hu D, Kong Y, Li W, Han Q, Zhang X, Zhu LX, et al. Frontline nurses' burnout, anxiety, depression, and fear statuses and  
670 their associated factors during the COVID-19 outbreak in Wuhan, China: A large-scale cross-sectional study.  
671 *EClinicalMedicine*. 2020;24. doi: 10.1016/j.eclinm.2020.100424.
- 672 103. Jakhar J, Biswas PS, Kapoor M, Panghal A, Meena A, Fani H, et al. Comparative study of the mental health impact of the  
673 COVID-19 pandemic on health care professionals in India. *Future microbiology*. 2021;16:1267-76. Epub 2021/10/23. doi:  
674 10.2217/fmb-2021-0084. PubMed PMID: 34674541; PubMed Central PMCID: PMCPCMC8544479.
- 675 104. Jo SH, Koo BH, Seo WS, Yun SH, Kim HG. The psychological impact of the coronavirus disease pandemic on hospital  
676 workers in Daegu, South Korea. *Comprehensive psychiatry*. 2020;103:6. doi: 10.1016/j.comppsy.2020.152213. PubMed PMID:  
677 WOS:000594225900008.
- 678 105. Kafle B, Bagale Y, Kafle S, Parajuli A, Pandey S. Depression, anxiety and stress among healthcare workers during covid-19  
679 pandemic in a tertiary care centre of nepal: A descriptive cross-sectional study. *Journal of the Nepal Medical Association*.  
680 2021;59(235):239-42. doi: 10.31729/jnma.6083.
- 681 106. Kamali M, Azizi M, Moosazadeh M, Mehravaran H, Ghasemian R, Reskati MH, et al. Occupational burnout in Iranian health  
682 care workers during the COVID-19 pandemic. *BMC psychiatry*. 2022;22(1). doi: 10.1186/s12888-022-04014-x.
- 683 107. Kandouci C, Mecabih F, Mecabih I, Kadari C, Megherbi N, Achouri MY, et al. Psychosocial impact of COVID-19 among health  
684 workers in Algeria. *Tunisie Medicale*. 2021;99(11):1015-29.
- 685 108. Kapetanios K, Mazeri S, Constantinou D, Vavlitou A, Karaiskakis M, Kourouzidou D, et al. Exploring the factors associated  
686 with the mental health of frontline healthcare workers during the COVID-19 pandemic in Cyprus. *PloS one*.  
687 2021;16(10):e0258475. Epub 2021/10/15. doi: 10.1371/journal.pone.0258475. PubMed PMID: 34648565; PubMed Central PMCID:  
688 PMCPCMC8516220.
- 689 109. Khan N, Palepu A, Dodek P, Salmon A, Leitch H, Ruzycski S, et al. Cross-sectional survey on physician burnout during the  
690 COVID-19 pandemic in Vancouver, Canada: The role of gender, ethnicity and sexual orientation. *BMJ open*. 2021;11(5). doi:  
691 10.1136/bmjopen-2021-050380.
- 692 110. Khatun MF, Parvin MF, Rashid MM, Alam MS, Kamrunnahar M, Talukder A, et al. Mental Health of Physicians During  
693 COVID-19 Outbreak in Bangladesh: A Web-Based Cross-Sectional Survey. *Frontiers in public health*. 2021;9:592058. Epub  
694 2021/02/27. doi: 10.3389/fpubh.2021.592058. PubMed PMID: 33634065; PubMed Central PMCID: PMCPCMC7902057.
- 695 111. Kiliç A, Gürcan MB, Aktura B, Şahin AR, Kökrek Z. Prevalence of anxiety and relationship of anxiety with coping styles and  
696 related factors in healthcare workers during COVID-19 pandemic. *Psychiatria Danubina*. 2021;33:161-71.
- 697 112. Lai J, Ma S, Wang Y, Cai Z, Hu J, Wei N, et al. Factors Associated With Mental Health Outcomes Among Health Care Workers  
698 Exposed to Coronavirus Disease 2019. *JAMA network open*. 2020;3(3):e203976. Epub 2020/03/24. doi:  
699 10.1001/jamanetworkopen.2020.3976. PubMed PMID: 32202646; PubMed Central PMCID: PMCPCMC7090843.
- 700 113. Lamiani G, Borghi L, Poli S, Razzini K, Colosio C, Vegni E. Hospital employees' well-being six months after the covid-19  
701 outbreak: Results from a psychological screening program in italy. *International journal of environmental research and public*  
702 *health*. 2021;18(11). doi: 10.3390/ijerph18115649.
- 703 114. Lasalvia A, Bodini L, Amaddeo F, Porru S, Carta A, Poli R, et al. The sustained psychological impact of the covid-19 pandemic  
704 on health care workers one year after the outbreak—a repeated cross-sectional survey in a tertiary hospital of north-east Italy.  
705 *International journal of environmental research and public health*. 2021;18(24). doi: 10.3390/ijerph182413374.
- 706 115. Li G, Miao J, Wang H, Xu S, Sun W, Fan Y, et al. Psychological impact on women health workers involved in COVID-19  
707 outbreak in Wuhan: A cross-sectional study. *Journal of Neurology, Neurosurgery and Psychiatry*. 2020;91(8):895-7. doi:  
708 10.1136/jnnp-2020-323134.
- 709 116. Li J, Guo J, Zhao J, Guo Y, Chen C. Influencing Factors of Mental Health Status of Dentists Under COVID-19 Epidemic.  
710 *Frontiers in Psychiatry*. 2022;13. doi: 10.3389/fpsy.2022.933514.
- 711 117. Li S, Chai R, Wang Y, Wang J, Dong X, Xu H, et al. A survey of mental health status of obstetric nurses during the novel  
712 coronavirus pneumonia pandemic. *Medicine*. 2021;100(52):e28070. Epub 2021/12/31. doi: 10.1097/md.00000000000028070.  
713 PubMed PMID: 34967352; PubMed Central PMCID: PMCPCMC8718244.
- 714 118. Li W, Mao X, Li J, Fang L, Du G, Qiao J, et al. Anxiety and Depression Among Imaging Doctors in Post-COVID-19 Period. *SN*  
715 *Comprehensive Clinical Medicine*. 2020;2(12):2595-9. doi: 10.1007/s42399-020-00654-w.
- 716 119. Li Y, Fan R, Lu Y, Li H, Liu X, Kong G, et al. Prevalence of psychological symptoms and associated risk factors among nurses  
717 in 30 provinces during the COVID-19 pandemic in China. *The Lancet Regional Health - Western Pacific*. 2022;100618. doi:  
718 <https://doi.org/10.1016/j.lanwpc.2022.100618>.

120. Liu CY, Yang YZ, Zhang XM, Xu X, Dou QL, Zhang WW, et al. The prevalence and influencing factors in anxiety in medical workers fighting COVID-19 in China: a cross-sectional survey. *Epidemiology and Infection*. 2020;148:e98. Epub 2020/05/21. doi: 10.1017/S0950268820001107. PubMed PMID: 32430088; PubMed Central PMCID: PMC7251286.
121. Lixia W, Xiaoming X, Lei S, Su H, Wo W, Xin F, et al. A cross-sectional study of the psychological status of 33,706 hospital workers at the late stage of the COVID-19 outbreak. *Journal of affective disorders*. 2022;297:156-68. doi: 10.1016/j.jad.2021.10.013.
122. Luceño-Moreno L, Talavera-Velasco B, García-Albuérne Y, Martín-García J. Symptoms of posttraumatic stress, anxiety, depression, levels of resilience and burnout in Spanish health personnel during the COVID-19 pandemic. *International journal of environmental research and public health*. 2020;17(15):1-29. doi: 10.3390/ijerph17155514.
123. Martín J, Padierna A, Villanueva A, Quintana JM. Evaluation of the mental health of health professionals in the COVID-19 era. What mental health conditions are our health care workers facing in the new wave of coronavirus? *International journal of clinical practice*. 2021;75(10):e14607. doi: 10.1111/ijcp.14607. PubMed PMID: MEDLINE:34231287.
124. Martínez Pajuelo AR, Irrazabal Ramos JE, Lazo-Porras M. Anxiety, Depression, and Post-Traumatic Stress Disorder (PTSD) Symptomatology According to Gender in Health-Care Workers during the COVID-19 Pandemic in Peru Shortened Title: "Psychological Impact of the Pandemic on Women". *International journal of environmental research and public health*. 2022;19(19). doi: 10.3390/ijerph191911957.
125. Martínez-Caballero CM, Cárdena-García RM, Varas-Manovel R, García-Sanz LM, Martínez-Piedra J, Fernández-Carbajo JJ, et al. Analyzing the impact of COVID-19 trauma on developing post-traumatic stress disorder among emergency medical workers in Spain. *International journal of environmental research and public health*. 2021;18(17). doi: 10.3390/ijerph18179132.
126. Martsenkovskiy D, Babych V, Martsenkovska I, Napryeyenko O, Napryeyenko N, Martsenkovsky I. Depression, anxiety, stress and trauma-related symptoms and their association with perceived social support in medical professionals during the COVID-19 pandemic in Ukraine. *Postepy Psychiatrii i Neurologii*. 2022;31(1):6-14. doi: 10.5114/ppn.2022.114657.
127. Mattila E, Peltokoski J, Neva MH, Kaunonen M, Helminen M, Parkkila A-K. COVID-19: anxiety among hospital staff and associated factors. *Annals of medicine*. 2021;53(1):237-46. doi: 10.1080/07853890.2020.1862905. PubMed PMID: MEDLINE:33350869.
128. McGuinness SL, Johnson J, Eades O, Cameron PA, Forbes A, Fisher J, et al. Mental Health Outcomes in Australian Healthcare and Aged-Care Workers during the Second Year of the COVID-19 Pandemic. *International journal of environmental research and public health*. 2022;19(9). Epub 2022/05/15. doi: 10.3390/ijerph19094951. PubMed PMID: 35564351; PubMed Central PMCID: PMC9103405.
129. Mekhemar M, Attia S, Dörfer C, Conrad J. Dental Nurses' Mental Health in Germany: A Nationwide Survey during the COVID-19 Pandemic. *International journal of environmental research and public health*. 2021;18(15). Epub 2021/08/08. doi: 10.3390/ijerph18158108. PubMed PMID: 34360401; PubMed Central PMCID: PMC8345776.
130. Mekhemar M, Attia S, Dörfer C, Conrad J. The psychological impact of the COVID-19 pandemic on dentists in Germany. *Journal of Clinical Medicine*. 2021;10(5):1-18. doi: 10.3390/jcm10051008.
131. Mennicken B, Petit G, Yombi J-C, Belkhir L, Deschietere G, Germeau N, et al. Psychological distress among hospital caregivers during and after the first wave of COVID-19: Individual factors involved in the severity of symptoms expression. *Psychiatry Research Communications*. 2022;2(2):100037. doi: <https://doi.org/10.1016/j.psycom.2022.100037>.
132. Meo SA, Alkhalifah JM, Alshammari NF, Alnufaie WS. Comparison of generalized anxiety and sleep disturbance among frontline and second-line healthcare workers during the COVID-19 pandemic. *International journal of environmental research and public health*. 2021;18(11). doi: 10.3390/ijerph18115727.
133. Mi T, Yang X, Sun S, Li X, Tam CC, Zhou Y, et al. Mental Health Problems of HIV Healthcare Providers During the COVID-19 Pandemic: The Interactive Effects of Stressors and Coping. *AIDS and Behavior*. 2021;25(1):18-27. Epub 2020/11/01. doi: 10.1007/s10461-020-03073-z. PubMed PMID: 33128108; PubMed Central PMCID: PMC7598225.
134. Morawa E, Schug C, Geiser F, Beschoner P, Jerg-Bretzke L, Albus C, et al. Psychosocial burden and working conditions during the COVID-19 pandemic in Germany: The VOICE survey among 3678 health care workers in hospitals. *Journal of psychosomatic research*. 2021;144:110415. Epub 2021/03/21. doi: 10.1016/j.jpsychores.2021.110415. PubMed PMID: 33743398; PubMed Central PMCID: PMC7944879.
135. Moro MF, Calamandrei G, Poli R, Di Mattei V, Perra A, Kurotschka PK, et al. The Impact of the COVID-19 Pandemic on the Mental Health of Healthcare Workers in Italy: Analyzing the Role of Individual and Workplace-Level Factors in the Reopening Phase After Lockdown. *Frontiers in Psychiatry*. 2022;13. doi: 10.3389/fpsy.2022.867080.
136. Mosheva M, Gross R, Hertz-Palmor N, Hasson-Ohayon I, Kaplan R, Cleper R, et al. The association between witnessing patient death and mental health outcomes in frontline COVID-19 healthcare workers. *Depression and Anxiety*. 2021;38(4):468-79. doi: 10.1002/da.23140.
137. Motahedi S, Aghdam NF, Khajeh M, Baha R, Aliyari R, Bagheri H, et al. Anxiety and depression among healthcare workers during COVID-19 pandemic: A cross-sectional study. *Heliyon*. 2021;7(12):e08570. doi: <https://doi.org/10.1016/j.heliyon.2021.e08570>.

- 775 138. Mulatu HA, Tesfaye M, Woldeyes E, Bayisa T, Fisseha H, Kassu RA. The prevalence of common mental disorders among  
776 healthcare professionals during the COVID-19 pandemic at a tertiary Hospital in Addis Ababa, Ethiopia. *Journal of Affective*  
777 *Disorders Reports*. 2021;6:100246. doi: <https://doi.org/10.1016/j.jadr.2021.100246>.
- 778 139. Nagarkar R, Patil R, Gadade K, Paleja N, Ramesh YV. Psychological and Mental Health Burden on Health Care Providers in a  
779 Cancer Centre during COVID-19 Pandemic Outbreak in India. *Psychiatria Danubina*. 2022;34(1):164-70. Epub 2022/04/26. doi:  
780 10.24869/psyd.2022.164. PubMed PMID: 35467634.
- 781 140. Nguyen TT, Le XTT, Nguyen NTT, Nguyen QN, Le HT, Pham QT, et al. Psychosocial Impacts of COVID-19 on Healthcare  
782 Workers During the Nationwide Partial Lockdown in Vietnam in April 2020. *Frontiers in Psychiatry*. 2021;12. doi:  
783 10.3389/fpsy.2021.562337.
- 784 141. Ning X, Yu F, Huang Q, Li X, Luo Y, Huang Q, et al. The mental health of neurological doctors and nurses in Hunan Province,  
785 China during the initial stages of the COVID-19 outbreak. *BMC psychiatry*. 2020;20(1). doi: 10.1186/s12888-020-02838-z.
- 786 142. Nordin S, Yaacob NA, Kelak J, Ilyas AH, Daud A. The Mental Health of Malaysia's Northwest Healthcare Workers during the  
787 Relaxation of COVID-19 Restrictions and Its Associated Factors. *International journal of environmental research and public*  
788 *health*. 2022;19(13). Epub 2022/07/10. doi: 10.3390/ijerph19137794. PubMed PMID: 35805454; PubMed Central PMCID:  
789 PMC9266069.
- 790 143. NS AL, AH AL, SS AL, Hersi AS. Depression among physicians and other medical employees involved in the COVID-19  
791 outbreak: A cross-sectional study. *Medicine*. 2021;100(15):e25290. Epub 2021/04/14. doi: 10.1097/md.00000000000025290.  
792 PubMed PMID: 33847627; PubMed Central PMCID: PMC8052024.
- 793 144. Olivares-Tirado P, Zanga-Pizarro R. Impact of COVID-19 pandemic outbreak on mental health of the hospital front-line  
794 healthcare workers in Chile: a difference-in-differences approach. *Journal of public health (Oxford, England)*. 2022. doi:  
795 10.1093/pubmed/fdac008.
- 796 145. Osório FL, Silveira ILM, Pereira-Lima K, Crippa JADS, Hallak JEC, Zuardi AW, et al. Risk and Protective Factors for the  
797 Mental Health of Brazilian Healthcare Workers in the Frontline of COVID-19 Pandemic. *Frontiers in Psychiatry*. 2021;12. doi:  
798 10.3389/fpsy.2021.662742.
- 799 146. Oteir AO, Nazzal MS, Jaber AF, Alwidyan MT, Raffee LA. Depression, anxiety and insomnia among frontline healthcare  
800 workers amid the coronavirus pandemic (COVID-19) in Jordan: a cross-sectional study. *BMJ open*. 2022;12(1):e050078. Epub  
801 2022/02/03. doi: 10.1136/bmjopen-2021-050078. PubMed PMID: 35105616; PubMed Central PMCID: PMC8804306.
- 802 147. Pan X, Xiao Y, Ren D, Xu ZM, Zhang Q, Yang LY, et al. Prevalence of mental health problems and associated risk factors  
803 among military healthcare workers in specialized COVID-19 hospitals in Wuhan, China: A cross-sectional survey. *Asia-Pacific*  
804 *psychiatry : official journal of the Pacific Rim College of Psychiatrists*. 2022;14(1):e12427. Epub 2020/10/23. doi:  
805 10.1111/appy.12427. PubMed PMID: 33089622; PubMed Central PMCID: PMC87645907.
- 806 148. Pandey A, Sharma C, Chapagain RH, Devkota N, Ranabhat K, Pant S, et al. Stress, Anxiety, Depression and Their Associated  
807 Factors among Health Care Workers During COVID -19 Pandemic in Nepal. *Journal of Nepal Health Research Council*.  
808 2021;18(4):655-60. Epub 2021/01/30. doi: 10.33314/jnhrc.v18i4.3190. PubMed PMID: 33510505.
- 809 149. Paniagua-Ávila A, Ramírez DE, Barrera-Pérez A, Calgua E, Castro C, Peralta-García A, et al. Mental health of Guatemalan  
810 health care workers during the COVID-19 pandemic: baseline findings from the HEROES cohort study. *Revista Panamericana*  
811 *de Salud Publica/Pan American Journal of Public Health*. 2022;46. doi: 10.26633/RPSP.2022.79.
- 812 150. Pappa S, Athanasiou N, Sakkas N, Patrinos S, Sakka E, Barmparessou Z, et al. From recession to depression? Prevalence and  
813 correlates of depression, anxiety, traumatic stress and burnout in healthcare workers during the covid-19 pandemic in greece:  
814 a multi-center, cross-sectional study. *International journal of environmental research and public health*. 2021;18(5):1-16. doi:  
815 10.3390/ijerph18052390.
- 816 151. Parthasarathy R, Ts J, K T, Murthy P. Mental health issues among health care workers during the COVID-19 pandemic – A  
817 study from India. *Asian journal of psychiatry*. 2021;58. doi: 10.1016/j.ajp.2021.102626.
- 818 152. Pelissier C, Paredes J, Moulin M, Bitot T, Fakra E, Fontana L. Telework and psychological health in hospital staff during the  
819 first wave of the COVID-19 epidemic in France. *International journal of environmental research and public health*. 2021;18(19).  
820 doi: 10.3390/ijerph181910433.
- 821 153. Pérez Herrera LC, Peñaranda D, Moreno-López S, Garcia E, Garcia IP, Peñaranda A. Mental health and daily and  
822 occupational activities of otolaryngologists in Colombia. *Otolaryngology - Head and Neck Surgery*. 2021;165(1 SUPPL):P323.  
823 doi: 10.1177/01945998211030910h.
- 824 154. Pisanu E, Di Benedetto A, Infurna MR, Rumiatu RI. Psychological Impact in Healthcare Workers During Emergencies: The  
825 Italian Experience With COVID-19 First Wave. *Frontiers in Psychiatry*. 2022;13. doi: 10.3389/fpsy.2022.818674.
- 826 155. Proserpio P, Zambrelli E, Lanza A, Dominese A, Di Giacomo R, Quintas R, et al. Sleep disorders and mental health in hospital  
827 workers during the COVID-19 pandemic: a cross-sectional multicenter study in Northern Italy. *Neurological Sciences*.  
828 2022;43(4):2241-51. doi: 10.1007/s10072-021-05813-y.
- 829 156. Rahman A, Deeba F, Akhter S, Bashar F, Nomani D, Koot J, et al. Mental health condition of physicians working frontline  
830 with COVID-19 patients in Bangladesh. *BMC psychiatry*. 2021;21(1):615. Epub 2021/12/11. doi: 10.1186/s12888-021-03629-w.  
831 PubMed PMID: 34886844; PubMed Central PMCID: PMC8655324.

- 832 157. Repon MAU, Pakhe SA, Quaiyum S, Das R, Daria S, Islam MR. Effect of COVID-19 pandemic on mental health among  
833 Bangladeshi healthcare professionals: A cross-sectional study. *Science progress*. 2021;104(2):368504211026409. Epub  
834 2021/06/25. doi: 10.1177/00368504211026409. PubMed PMID: 34166132.
- 835 158. Riaz B, Rafai WA, Ussaid A, Masood A, Anwar S, Baig FA, et al. The psychological impact of COVID-19 on healthcare  
836 workers in Pakistan. *Future Healthcare Journal*. 2021;8(2):E293-E8. doi: 10.7861/FHJ.2020-0193.
- 837 159. RilleraMarzo R, Villanueva EQ, Chandra U, Htay MNN, Shrestha R, Shrestha S. Risk Perception, Mental Health Impacts and  
838 Coping Strategies during Covid-19 Pandemic among Filipino Healthcare Workers. *Journal of Public Health Research*.  
839 2021;10(2\_suppl). doi: 10.4081/jphr.2021.2604.
- 840 160. Rossi R, Socci V, Pacitti F, Di Lorenzo G, Di Marco A, Siracusano A, et al. Mental Health Outcomes Among Frontline and  
841 Second-Line Health Care Workers During the Coronavirus Disease 2019 (COVID-19) Pandemic in Italy. *JAMA network open*.  
842 2020;3(5):e2010185-e. doi: 10.1001/jamanetworkopen.2020.10185. PubMed PMID: 143494368. Language: English. Entry Date:  
843 20200602. Revision Date: 20200629. Publication Type: Article.
- 844 161. Sabbaghi M, Miri K, Kahi R, Nia MN. Investigation of stress, anxiety, and depression levels of Pre-Hospital Emergency  
845 Medicine personnel in eastern Iran during the Covid-19 pandemic. *BMC emergency medicine*. 2022;22(1). doi:  
846 10.1186/s12873-022-00647-z.
- 847 162. Salehiniya H, Abbaszadeh H. Prevalence of corona-associated anxiety and mental health disorder among dentists during the  
848 COVID-19 pandemic. *Neuropsychopharmacology Reports*. 2021;41(2):223-9. doi: 10.1002/npr2.12179.
- 849 163. Salman M, Mustafa ZU, Raza MH, Khan TM, Asif N, Tahir H, et al. Psychological Effects of COVID-19 among Healthcare  
850 Workers and How They Are Coping: A Web-based, Cross-sectional Study during the First Wave of COVID-19 in Pakistan.  
851 *Disaster medicine and public health preparedness*. 2022;1-13. doi: 10.1017/dmp.2022.4.
- 852 164. Samir AlKudsi Z, Hany Kamel N, El-Awaisi A, Shraim M, Saffouh El Hajj M. Mental health, burnout and resilience in  
853 community pharmacists during the COVID-19 pandemic: A cross-sectional study. *Saudi Pharmaceutical Journal*.  
854 2022;30(7):1009-17. doi: 10.1016/j.jsps.2022.04.015.
- 855 165. Sertoz OO, Tuncel OK, Sertoz N, Hepdurgun C, Haznedaroglu DI, Bor C. Burnout in Healthcare Professionals During the  
856 Covid-19 Pandemic in a Tertiary Care University Hospital: Evaluation of the Need for Psychological Support. *Turk Psikiyatr*  
857 *Derg*. 2021;32(2):75-86. doi: 10.5080/u25964. PubMed PMID: WOS:000697193200001.
- 858 166. Setiawati Y, Wahyuhadi J, Joestandari F, Maramis MM, Atika A. Anxiety and resilience of healthcare workers during  
859 COVID-19 pandemic in Indonesia. *Journal of Multidisciplinary Healthcare*. 2021;14:1-8. doi: 10.2147/JMDH.S276655.
- 860 167. Shah ED, Pourmorteza M, Elmunzer BJ, Ballou SK, Papachristou GI, Lara LF, et al. Psychological Health Among  
861 Gastroenterologists During the COVID-19 Pandemic: A National Survey. *Clinical gastroenterology and hepatology : the*  
862 *official clinical practice journal of the American Gastroenterological Association*. 2021;19(4):836-8.e3. Epub 2020/12/06. doi:  
863 10.1016/j.cgh.2020.11.043. PubMed PMID: 33278574; PubMed Central PMCID: PMC7955767.
- 864 168. Shah J, Monroe-Wise A, Talib Z, Nabiswa A, Said M, Abeid A, et al. Mental health disorders among healthcare workers  
865 during the COVID-19 pandemic: a cross-sectional survey from three major hospitals in Kenya. *BMJ open*. 2021;11(6):e050316.  
866 Epub 2021/06/11. doi: 10.1136/bmjopen-2021-050316. PubMed PMID: 34108174; PubMed Central PMCID: PMC8190985.
- 867 169. Shah N, Raheem A, Sideris M, Velauthar L, Saeed F. Mental health amongst obstetrics and gynaecology doctors during the  
868 COVID-19 pandemic: Results of a UK-wide study. *European Journal of Obstetrics and Gynecology and Reproductive Biology*.  
869 2020;253:90-4. doi: 10.1016/j.ejogrb.2020.07.060.
- 870 170. Shechter A, Chiuzaan C, Shang Y, Ko G, Diaz F, Venner HK, et al. Prevalence, incidence, and factors associated with  
871 posttraumatic stress at three-month follow-up among new york city healthcare workers after the first wave of the COVID-19  
872 pandemic. *International journal of environmental research and public health*. 2022;19(1). doi: 10.3390/ijerph19010262.
- 873 171. Shechter A, Diaz F, Moise N, Anstey DE, Ye S, Agarwal S, et al. Psychological distress, coping behaviors, and preferences for  
874 support among New York healthcare workers during the COVID-19 pandemic. *General hospital psychiatry*. 2020;66:1-8. doi:  
875 10.1016/j.genhosppsych.2020.06.007.
- 876 172. Shen H, Wang H, Zhou F, Chen J, Deng L. Mental health status of medical staff in the epidemic period of coronavirus disease  
877 2019. *Zhong nan da xue xue bao Yi xue ban = Journal of Central South University Medical sciences*. 2020;45(6):633-40. Epub  
878 2020/09/04. doi: 10.11817/j.issn.1672-7347.2020.200070. PubMed PMID: 32879119.
- 879 173. Shrestha SL. Prevalence of Psychological Effect of COVID-19 on Medical Professionals in a Tertiary Care Center. *JNMA;*  
880 *journal of the Nepal Medical Association*. 2020;58(228):550-3. Epub 2020/09/25. doi: 10.31729/jnma.5087. PubMed PMID:  
881 32968286; PubMed Central PMCID: PMC7580372.
- 882 174. Siamisang K, Keadiretse D, Tjirare LT, Muyela C, Gare K, Masupe T. Prevalence and predictors of depression, anxiety and  
883 stress among frontline healthcare workers at COVID-19 isolation sites in Gaborone, Botswana. *PloS one*. 2022;17(8):e0273052.  
884 Epub 2022/08/24. doi: 10.1371/journal.pone.0273052. PubMed PMID: 35998130; PubMed Central PMCID: PMC9398030.
- 885 175. Simonetti V, Durante A, Ambrosca R, Arcadi P, Graziano G, Pucciarelli G, et al. Anxiety, sleep disorders and self-efficacy  
886 among nurses during COVID-19 pandemic: A large cross-sectional study. *Journal of clinical nursing*. 2021;30(9-10):1360-71.  
887 doi: 10.1111/jocn.15685. PubMed PMID: WOS:000617966300001.

176. Singh J, Sood M, Chadda RK, Singh V, Kattula D. Mental health issues and coping among health care workers during COVID-19 pandemic: Indian perspective. *Asian journal of psychiatry*. 2021;61:102685. doi: <https://doi.org/10.1016/j.ajp.2021.102685>.
177. Sitanggang FP, Wirawan GBS, Wirawan IMA, Lesmana CBJ, Januraga PP. Determinants of mental health and practice behaviors of general practitioners during covid-19 pandemic in Bali, Indonesia: A cross-sectional study. *Risk Management and Healthcare Policy*. 2021;14:2055-64. doi: 10.2147/RMHP.S305373.
178. Smallwood N, Karimi L, Bismark M, Putland M, Johnson D, Dharmage SC, et al. High levels of psychosocial distress among Australian frontline healthcare workers during the COVID-19 pandemic: A cross-sectional survey. *General Psychiatry*. 2021;34(5). doi: 10.1136/gpsych-2021-100577.
179. Sobregau Sangra P, Aguilo Mir S, Castro Ribeiro T, Esteban-Sepulveda S, Garcia Pages E, Lopez Barbeito B, et al. Mental health assessment of Spanish healthcare workers during the SARS-CoV-2 pandemic. A cross-sectional study. *Comprehensive psychiatry*. 2022;112:152278. doi: 10.1016/j.comppsy.2021.152278. PubMed PMID: MEDLINE:34678607.
180. Song X, Fu W, Liu X, Luo Z, Wang R, Zhou N, et al. Mental health status of medical staff in emergency departments during the Coronavirus disease 2019 epidemic in China. *Brain, behavior, and immunity*. 2020;88:60-5. Epub 2020/06/09. doi: 10.1016/j.bbi.2020.06.002. PubMed PMID: 32512134; PubMed Central PMCID: PMCPCMC7273140.
181. Srikanth P, Monsey LM, Meischke HW, Baker MG. Determinants of Stress, Depression, Quality of Life, and Intent to Leave in Washington State Emergency Medical Technicians During COVID-19. *Journal of occupational and environmental medicine*. 2022;64(8):642-8. doi: 10.1097/JOM.0000000000002587.
182. Stocchetti N, Segre G, Zanier ER, Zanetti M, Campi R, Scarpellini F, et al. Burnout in intensive care unit workers during the second wave of the covid-19 pandemic: A single center cross-sectional Italian study. *International journal of environmental research and public health*. 2021;18(11). doi: 10.3390/ijerph18116102.
183. Su PA, Lo MC, Wang CL, Yang PC, Chang CI, Huang MC, et al. The correlation between professional quality of life and mental health outcomes among hospital personnel during the Covid-19 pandemic in Taiwan. *Journal of Multidisciplinary Healthcare*. 2021;14:3485-95. doi: 10.2147/JMDH.S330533.
184. Su Q, Ma X, Liu S, Liu S, Goodman BA, Yu M, et al. Adverse Psychological Reactions and Psychological Aids for Medical Staff During the COVID-19 Outbreak in China. *Frontiers in Psychiatry*. 2021;12. doi: 10.3389/fpsy.2021.580067.
185. Sun D, Yang D, Li Y, Zhou J, Wang W, Wang Q, et al. Psychological impact of 2019 novel coronavirus (2019-nCoV) outbreak in health workers in China. *Epidemiology and infection*. 2020;148:e96. Epub 2020/05/21. doi: 10.1017/s0950268820001090. PubMed PMID: 32430086; PubMed Central PMCID: PMCPCMC7251284.
186. Suryavanshi N, Kadam A, Dhumal G, Nimkar S, Mave V, Gupta A, et al. Mental health and quality of life among healthcare professionals during the COVID-19 pandemic in India. *Brain and behavior*. 2020;10(11):e01837. Epub 2020/09/13. doi: 10.1002/brb3.1837. PubMed PMID: 32918403; PubMed Central PMCID: PMCPCMC7667343.
187. Syamlan AT, Salamah S, Alkaff FF, Prayudi YE, Kamil M, Irzaldy A, et al. Mental health and health-related quality of life among healthcare workers in Indonesia during the COVID-19 pandemic: a cross-sectional study. *BMJ open*. 2022;12(4):e057963. Epub 2022/04/10. doi: 10.1136/bmjopen-2021-057963. PubMed PMID: 35396304; PubMed Central PMCID: PMCPCMC8996007.
188. Maslach C, Jackson SE. The measurement of experienced burnout. *Journal of Organizational Behavior*. 1981;2(2):99-113. doi: 10.1002/job.4030020205.
189. Demerouti E, Bakker AB, Vardakou I, Kantas A. The convergent validity of two burnout instruments: A multitrait-multimethod analysis. *European Journal of Psychological Assessment*. 2003;19(1):12-23. doi: 10.1027/1015-5759.19.1.12.
190. Tan BYQ, Chew NWS, Lee GKH, Jing M, Goh Y, Yeo LLL, et al. Psychological impact of the COVID-19 pandemic on health care workers in Singapore. *Annals of internal medicine*. 2020;173(4):317-20. doi: 10.7326/M20-1083.
191. Tan YQ, Wang Z, Yap QV, Chan YH, Ho RC, Hamid ARAH, et al. Psychological Health of Surgeons in a Time of COVID-19: A Global Survey. *Annals of surgery*. 2021. doi: 10.1097/SLA.0000000000004775.
192. Tang J, Wu Y, Qi H, Li D, Shi J, Wang W, et al. Psychological outcomes and associated factors amongst healthcare workers during a single wave, deeper into the COVID-19 pandemic in China. *Frontiers in Psychiatry*. 2022;13. doi: 10.3389/fpsy.2022.983909.
193. Tao J, Lin Y, Jiang L, Zhou Z, Zhao J, Qu D, et al. Psychological Impact of the COVID-19 Pandemic on Emergency Dental Care Providers on the Front Lines in China. *International Dental Journal*. 2021;71(3):197-205. doi: <https://doi.org/10.1016/j.identj.2020.12.001>.
194. Taşdelen R, Ayik B, Kaya H, Ercis M, Ertekin E. Psychological Reactions of Turkish Healthcare Workers During Covid-19 Outbreak: The Impact of Stigmatization. *Noropsikiyatri Arsivi*. 2022;59(2):133-8. doi: 10.29399/npa.27785.
195. Than HM, Nong VM, Nguyen CT, Dong KP, Ngo HT, Doan TT, et al. Mental health and health-related quality-of-life outcomes among frontline health workers during the peak of covid-19 outbreak in Vietnam: A cross-sectional study. *Risk Management and Healthcare Policy*. 2020;13:2927-36. doi: 10.2147/RMHP.S280749.
196. Turan O, Demirci NY, Güntülü AK, Akçay Ş, Aktürk ÜA, Bilaçeroğlu S, et al. Anxiety and depression levels of healthcare workers during Covid-19 pandemic. *African health sciences*. 2022;22(1):532-40. doi: 10.4314/ahs.v22i1.62.

- 946 197. Uyaroğlu OA, Başaran N, Ozisik L, Karahan S, Tanriover MD, Guven GS, et al. Evaluation of the effect of COVID-19  
947 pandemic on anxiety severity of physicians working in the internal medicine department of a tertiary care hospital: a  
948 cross-sectional survey. *Internal medicine journal*. 2020;50(11):1350-8. Epub 2020/10/03. doi: 10.1111/imj.14981. PubMed PMID:  
949 33006419; PubMed Central PMCID: PMC7537014.
- 950 198. Uz B, Savaşan E, Soğancı D. Anxiety, Depression and Burnout Levels of Turkish Healthcare Workers at the End of the First  
951 Period of COVID-19 Pandemic in Turkey. *Clinical Psychopharmacology and Neuroscience*. 2022;20(1):97-108. doi:  
952 10.9758/CPN.2022.20.1.97.
- 953 199. Vadi S, Shah S, Bajpe S, George N, Santhosh A, Sanwalka N, et al. Mental Health Indices of Intensive Care Unit and  
954 Emergency Room Frontliners during the Severe Acute Respiratory Syndrome Coronavirus 2 Pandemic in India. *Indian  
955 Journal of Critical Care Medicine*. 2022;26(1):100-7. doi: 10.5005/jp-journals-10071-24081.
- 956 200. Valaine L, Ancâne G, Utināns A, Brīģis Ģ. Mental Health and Associated Demographic and Occupational Factors among  
957 Health Care Workers during the COVID-19 Pandemic in Latvia. *Medicina (Kaunas, Lithuania)*. 2021;57(12). Epub 2021/12/25.  
958 doi: 10.3390/medicina57121381. PubMed PMID: 34946326; PubMed Central PMCID: PMC7505324.
- 959 201. van de Venter R, Williams R, Stindt C, ten Ham-Baloyi W. Coronavirus-related anxiety and fear among South African  
960 diagnostic radiographers working in the clinical setting during the pandemic. *Journal of Medical Imaging and Radiation  
961 Sciences*. 2021;52(4):586-94. doi: 10.1016/j.jmir.2021.09.016.
- 962 202. Van Wert MJ, Gandhi S, Gupta I, Singh A, Eid SM, Haroon Burhanullah M, et al. Healthcare Worker Mental Health After the  
963 Initial Peak of the COVID-19 Pandemic: a US Medical Center Cross-Sectional Survey. *Journal of general internal medicine*.  
964 2022;37(5):1169-76. Epub 2022/01/08. doi: 10.1007/s11606-021-07251-0. PubMed PMID: 34993856; PubMed Central PMCID:  
965 PMC734540.
- 966 203. Vancappel A, Jansen E, Ouhmad N, Desmidt T, Etain B, Bergey C, et al. Psychological Impact of Exposure to the COVID-19  
967 Sanitary Crisis on French Healthcare Workers: Risk Factors and Coping Strategies. *Frontiers in Psychiatry*. 2021;12. doi:  
968 10.3389/fpsy.2021.701127.
- 969 204. Wanigasooriya K, Palimar P, Naumann DN, Ismail K, Fellows JL, Logan P, et al. Mental health symptoms in a cohort of  
970 hospital healthcare workers following the first peak of the COVID-19 pandemic in the UK. *BJPsych Open*. 2020;7(1). doi:  
971 10.1192/bjo.2020.150.
- 972 205. Wayessa ZJ, Melesse GT, Amaje Hadona E, Wako WG. Prevalence of depressive symptoms due to COVID-19 and associated  
973 factors among healthcare workers in Southern Ethiopia. *SAGE Open Medicine*. 2021;9. doi: 10.1177/20503121211032810.
- 974 206. Weibelzahl S, Reiter J, Duden G. Depression and Anxiety in Healthcare Professionals during the COVID-19 Pandemic.  
975 *Epidemiology and infection*. 2021. doi: 10.1017/S0950268821000303.
- 976 207. Xiong H, Yi S, Lin Y. The Psychological Status and Self-Efficacy of Nurses During COVID-19 Outbreak: A Cross-Sectional  
977 Survey. *Inquiry : a journal of medical care organization, provision and financing*. 2020;57:46958020957114. Epub 2020/09/10.  
978 doi: 10.1177/0046958020957114. PubMed PMID: 32900271; PubMed Central PMCID: PMC7485150.
- 979 208. Yadeta TA, Dessie Y, Balis B. Magnitude and Predictors of Health Care Workers Depression During the COVID-19 Pandemic:  
980 Health Facility-Based Study in Eastern Ethiopia. *Frontiers in Psychiatry*. 2021;12. doi: 10.3389/fpsy.2021.654430.
- 981 209. Yang Y, Liu D, Liu B, Ou W, Wang L, Ma Y, et al. Prevalence of Post-traumatic Stress Disorder Status Among Healthcare  
982 Workers and Its Impact on Their Mental Health During the Crisis of COVID-19: A Cross-Sectional Study. *Frontiers in public  
983 health*. 2022;10:904550. Epub 2022/08/06. doi: 10.3389/fpubh.2022.904550. PubMed PMID: 35928490; PubMed Central PMCID:  
984 PMC7343759.
- 985 210. Youssfi I, Mechergui N, Merchaoui I, Bouden F, Said HB, Youssef I, et al. Perception of mental health and professional quality  
986 of life in Tunisian doctors during the COVID-19 pandemic: a descriptive cross-sectional study. *The Pan African medical  
987 journal*. 2021;40:139. Epub 2021/12/16. doi: 10.11604/pamj.2021.40.139.30358. PubMed PMID: 34909107; PubMed Central  
988 PMCID: PMC7505324.
- 989 211. Yu B, Barnett D, Menon V, Rabiee L, De Castro YS, Kasubhai M, et al. Healthcare worker trauma and related mental health  
990 outcomes during the COVID-19 outbreak in New York City. *PloS one*. 2022;17(4 April). doi: 10.1371/journal.pone.0267315.
- 991 212. Zarzour M, Hachem C, Kerbage H, Richa S, Choueifaty DE, Saliba G, et al. Anxiety and sleep quality in a sample of Lebanese  
992 healthcare workers during the COVID-19 outbreak. *L'Encephale*. 2022;48(5):496-503. doi: 10.1016/j.encep.2021.06.016.
- 993 213. Edmondson D, von Känel R. Post-traumatic stress disorder and cardiovascular disease. *The Lancet Psychiatry*. 2017;4(4):320-  
994 329. doi: 10.1016/S2215-0366(16)30377-7.
- 995 214. Zhan J, Chen C, Yan X, Wei X, Zhan L, Chen H, et al. Relationship between social support, anxiety, and depression among  
996 frontline healthcare workers in China during COVID-19 pandemic. *Frontiers in Psychiatry*. 2022;13. doi:  
997 10.3389/fpsy.2022.947945.
- 998 215. World Health Organization. WHO validates 11th vaccine for COVID-19. World Health Organization. 2022. Available from:  
999 <https://www.who.int/news/item/2022-04-14-who-validates-11th-vaccine-for-covid-19>
- 1000 216. Zhang H, Shi Y, Jing P, Zhan P, Fang Y, Wang F. Posttraumatic stress disorder symptoms in healthcare workers after the peak  
1001 of the COVID-19 outbreak: A survey of a large tertiary care hospital in Wuhan. *Psychiatry research*. 2020;294:113541. Epub  
1002 2020/11/01. doi: 10.1016/j.psychres.2020.113541. PubMed PMID: 33128999; PubMed Central PMCID: PMC7585629.

- 
- 1003 217. World Health Organization. Statement on the fourteenth meeting of the International Health Regulations (2005) Emergency  
1004 Committee regarding the coronavirus disease (COVID-19) pandemic. World Health Organization. 2023. Available from:  
1005 [https://www.who.int/news/item/2023/statement-on-the-fourteenth-meeting-of-the-international-health-regulations-\(2005\)-em](https://www.who.int/news/item/2023/statement-on-the-fourteenth-meeting-of-the-international-health-regulations-(2005)-em)  
1006 [emergency-committee-regarding-the-coronavirus-disease-\(covid-19\)-pandemic](https://www.who.int/news/item/2023/statement-on-the-fourteenth-meeting-of-the-international-health-regulations-(2005)-em)
- 1007 218. Zhang J, Song S, Zhang M, Wang R. Influencing factors for mental health of general practitioners in Hebei Province under the  
1008 outbreak of COVID-19: A cross-sectional study. *International journal of clinical practice*. 2021;75(11):e14783. Epub 2021/09/06.  
1009 doi: 10.1111/ijcp.14783. PubMed PMID: 34482597; PubMed Central PMCID: PMC8646492.
- 1010 219. Zhang X, Zou R, Liao X, Bernardo ABI, Du H, Wang Z, et al. Perceived Stress, Hope, and Health Outcomes Among Medical  
1011 Staff in China During the COVID-19 Pandemic. *Frontiers in Psychiatry*. 2020;11. doi: 10.3389/fpsy.2020.588008.
- 1012 220. Zhang Y, Pi DD, Liu CJ, Li J, Xu F. Psychological impact of the COVID-19 epidemic among healthcare workers in paediatric  
1013 intensive care units in China. *PloS one*. 2022;17(5 May). doi: 10.1371/journal.pone.0265377.
- 1014 221. Zheng R, Zhou Y, Qiu M, Yan Y, Yue J, Yu L, et al. Prevalence and associated factors of depression, anxiety, and stress among  
1015 Hubei pediatric nurses during COVID-19 pandemic. *Comprehensive psychiatry*. 2021;104. doi:  
1016 10.1016/j.comppsy.2020.152217.
- 1017 222. Zhu Z, Xu S, Wang H, Liu Z, Wu J, Li G, et al. COVID-19 in Wuhan: Sociodemographic characteristics and hospital support  
1018 measures associated with the immediate psychological impact on healthcare workers. *EClinicalMedicine*. 2020;24. doi:  
1019 10.1016/j.eclinm.2020.100443.
